# Supplementary material for: Gas-Sensing Performance of Metal Oxide Heterojunction Materials for SF6 Decomposition Gases: A DFT Study
Source: MDPI journal article supplement (doi:10.3390/ijms25158009), 2024-07-23
Supplement: s1 [file ijms-3054736-supplementary.pdf › ijms-3054736-supplementary.pdf]

In<sub>2</sub>O<sub>3</sub>-ZnO

---



---

Title In<sub>2</sub>O<sub>3</sub>-ZnO

Lattice type P  
Space group name P 1  
Space group number 1  
Setting number 1

## Lattice parameters

|          |          |          |         |         |         |
|----------|----------|----------|---------|---------|---------|
| a        | b        | c        | alpha   | beta    | gamma   |
| 11.14410 | 16.13730 | 27.43750 | 90.0000 | 90.0000 | 90.0000 |

Unit-cell volume = 4934.241839 Å<sup>3</sup>

## Structure parameters

|       |      | x       | y       | z        | Occ.  | U     | Site | Sym. |
|-------|------|---------|---------|----------|-------|-------|------|------|
| 1 Zn  | Zn1  | 0.12208 | 0.05109 | 0.11490  | 1.000 | 0.000 | 1a   | 1    |
| 2 Zn  | Zn2  | 0.34709 | 0.14429 | 0.08962  | 1.000 | 0.000 | 1a   | 1    |
| 3 O   | O3   | 0.10575 | 0.06085 | -0.02356 | 1.000 | 0.000 | 1a   | 1    |
| 4 O   | O4   | 0.34834 | 0.15728 | 0.01272  | 1.000 | 0.000 | 1a   | 1    |
| 5 Zn  | Zn5  | 0.01571 | 0.14830 | -0.00129 | 1.000 | 0.000 | 1a   | 1    |
| 6 Zn  | Zn6  | 0.26655 | 0.04548 | 0.00216  | 1.000 | 0.000 | 1a   | 1    |
| 7 O   | O7   | 0.00362 | 0.14514 | 0.12066  | 1.000 | 0.000 | 1a   | 1    |
| 8 O   | O8   | 0.27166 | 0.03723 | 0.07866  | 1.000 | 0.000 | 1a   | 1    |
| 9 Zn  | Zn9  | 0.08168 | 0.25489 | 0.10897  | 1.000 | 0.000 | 1a   | 1    |
| 10 Zn | Zn10 | 0.33504 | 0.36271 | 0.10455  | 1.000 | 0.000 | 1a   | 1    |
| 11 O  | O11  | 0.08618 | 0.24807 | 0.02724  | 1.000 | 0.000 | 1a   | 1    |
| 12 O  | O12  | 0.33858 | 0.35968 | 0.02008  | 1.000 | 0.000 | 1a   | 1    |
| 13 Zn | Zn13 | 0.00681 | 0.34986 | 0.00958  | 1.000 | 0.000 | 1a   | 1    |
| 14 Zn | Zn14 | 0.25561 | 0.25648 | 0.01701  | 1.000 | 0.000 | 1a   | 1    |
| 15 O  | O15  | 0.01574 | 0.37033 | 0.10944  | 1.000 | 0.000 | 1a   | 1    |
| 16 O  | O16  | 0.26487 | 0.24797 | 0.11310  | 1.000 | 0.000 | 1a   | 1    |
| 17 Zn | Zn17 | 0.10077 | 0.46344 | 0.07346  | 1.000 | 0.000 | 1a   | 1    |
| 18 Zn | Zn18 | 0.36857 | 0.56120 | 0.09568  | 1.000 | 0.000 | 1a   | 1    |
| 19 O  | O19  | 0.10297 | 0.44430 | -0.00338 | 1.000 | 0.000 | 1a   | 1    |
| 20 O  | O20  | 0.35880 | 0.54334 | -0.04049 | 1.000 | 0.000 | 1a   | 1    |
| 21 Zn | Zn21 | 0.01908 | 0.55953 | -0.01468 | 1.000 | 0.000 | 1a   | 1    |
| 22 Zn | Zn22 | 0.27197 | 0.45681 | -0.01485 | 1.000 | 0.000 | 1a   | 1    |
| 23 O  | O23  | 0.01787 | 0.56439 | 0.06069  | 1.000 | 0.000 | 1a   | 1    |
| 24 O  | O24  | 0.25129 | 0.46799 | 0.10723  | 1.000 | 0.000 | 1a   | 1    |
| 25 Zn | Zn25 | 0.12115 | 0.65239 | 0.09266  | 1.000 | 0.000 | 1a   | 1    |
| 26 Zn | Zn26 | 0.36039 | 0.74602 | 0.06143  | 1.000 | 0.000 | 1a   | 1    |
| 27 O  | O27  | 0.10872 | 0.65137 | -0.03981 | 1.000 | 0.000 | 1a   | 1    |
| 28 O  | O28  | 0.36056 | 0.75236 | -0.01850 | 1.000 | 0.000 | 1a   | 1    |
| 29 Zn | Zn29 | 0.03688 | 0.74891 | -0.01390 | 1.000 | 0.000 | 1a   | 1    |
| 30 Zn | Zn30 | 0.27501 | 0.64601 | -0.02200 | 1.000 | 0.000 | 1a   | 1    |
| 31 O  | O31  | 0.03279 | 0.74861 | 0.06940  | 1.000 | 0.000 | 1a   | 1    |
| 32 O  | O32  | 0.27538 | 0.64254 | 0.05967  | 1.000 | 0.000 | 1a   | 1    |
| 33 Zn | Zn33 | 0.11029 | 0.85563 | 0.07259  | 1.000 | 0.000 | 1a   | 1    |
| 34 Zn | Zn34 | 0.36070 | 0.93803 | 0.10409  | 1.000 | 0.000 | 1a   | 1    |
| 35 O  | O35  | 0.10324 | 0.86212 | -0.00651 | 1.000 | 0.000 | 1a   | 1    |
| 36 O  | O36  | 0.35006 | 0.96261 | -0.03450 | 1.000 | 0.000 | 1a   | 1    |
| 37 Zn | Zn37 | 0.01769 | 0.95834 | -0.02693 | 1.000 | 0.000 | 1a   | 1    |
| 38 Zn | Zn38 | 0.28109 | 0.85869 | -0.01390 | 1.000 | 0.000 | 1a   | 1    |
| 39 O  | O39  | 0.03971 | 0.94328 | 0.11583  | 1.000 | 0.000 | 1a   | 1    |
| 40 O  | O40  | 0.28505 | 0.85385 | 0.06569  | 1.000 | 0.000 | 1a   | 1    |
| 41 Zn | Zn41 | 0.62208 | 0.05109 | 0.11490  | 1.000 | 0.000 | 1a   | 1    |
| 42 Zn | Zn42 | 0.84709 | 0.14429 | 0.08962  | 1.000 | 0.000 | 1a   | 1    |
| 43 O  | O43  | 0.60575 | 0.06085 | -0.02356 | 1.000 | 0.000 | 1a   | 1    |

|        |       |          |         |          |       |       |    |   |
|--------|-------|----------|---------|----------|-------|-------|----|---|
| 44 O   | O44   | 0.84834  | 0.15728 | 0.01272  | 1.000 | 0.000 | 1a | 1 |
| 45 Zn  | Zn45  | 0.51571  | 0.14830 | -0.00129 | 1.000 | 0.000 | 1a | 1 |
| 46 Zn  | Zn46  | 0.76655  | 0.04548 | 0.00216  | 1.000 | 0.000 | 1a | 1 |
| 47 O   | O47   | 0.50362  | 0.14514 | 0.12066  | 1.000 | 0.000 | 1a | 1 |
| 48 O   | O48   | 0.77166  | 0.03723 | 0.07866  | 1.000 | 0.000 | 1a | 1 |
| 49 Zn  | Zn49  | 0.58168  | 0.25489 | 0.10897  | 1.000 | 0.000 | 1a | 1 |
| 50 Zn  | Zn50  | 0.83504  | 0.36271 | 0.10455  | 1.000 | 0.000 | 1a | 1 |
| 51 O   | O51   | 0.58618  | 0.24807 | 0.02724  | 1.000 | 0.000 | 1a | 1 |
| 52 O   | O52   | 0.83858  | 0.35968 | 0.02008  | 1.000 | 0.000 | 1a | 1 |
| 53 Zn  | Zn53  | 0.50681  | 0.34986 | 0.00958  | 1.000 | 0.000 | 1a | 1 |
| 54 Zn  | Zn54  | 0.75561  | 0.25648 | 0.01701  | 1.000 | 0.000 | 1a | 1 |
| 55 O   | O55   | 0.51574  | 0.37033 | 0.10944  | 1.000 | 0.000 | 1a | 1 |
| 56 O   | O56   | 0.76487  | 0.24797 | 0.11310  | 1.000 | 0.000 | 1a | 1 |
| 57 Zn  | Zn57  | 0.60077  | 0.46344 | 0.07346  | 1.000 | 0.000 | 1a | 1 |
| 58 Zn  | Zn58  | 0.86857  | 0.56120 | 0.09568  | 1.000 | 0.000 | 1a | 1 |
| 59 O   | O59   | 0.60297  | 0.44430 | -0.00338 | 1.000 | 0.000 | 1a | 1 |
| 60 O   | O60   | 0.85880  | 0.54334 | -0.04049 | 1.000 | 0.000 | 1a | 1 |
| 61 Zn  | Zn61  | 0.51908  | 0.55953 | -0.01468 | 1.000 | 0.000 | 1a | 1 |
| 62 Zn  | Zn62  | 0.77197  | 0.45681 | -0.01485 | 1.000 | 0.000 | 1a | 1 |
| 63 O   | O63   | 0.51787  | 0.56439 | 0.06069  | 1.000 | 0.000 | 1a | 1 |
| 64 O   | O64   | 0.75129  | 0.46799 | 0.10723  | 1.000 | 0.000 | 1a | 1 |
| 65 Zn  | Zn65  | 0.62115  | 0.65239 | 0.09266  | 1.000 | 0.000 | 1a | 1 |
| 66 Zn  | Zn66  | 0.86039  | 0.74602 | 0.06143  | 1.000 | 0.000 | 1a | 1 |
| 67 O   | O67   | 0.60872  | 0.65137 | -0.03981 | 1.000 | 0.000 | 1a | 1 |
| 68 O   | O68   | 0.86056  | 0.75236 | -0.01850 | 1.000 | 0.000 | 1a | 1 |
| 69 Zn  | Zn69  | 0.53688  | 0.74891 | -0.01390 | 1.000 | 0.000 | 1a | 1 |
| 70 Zn  | Zn70  | 0.77501  | 0.64601 | -0.02200 | 1.000 | 0.000 | 1a | 1 |
| 71 O   | O71   | 0.53279  | 0.74861 | 0.06940  | 1.000 | 0.000 | 1a | 1 |
| 72 O   | O72   | 0.77538  | 0.64254 | 0.05967  | 1.000 | 0.000 | 1a | 1 |
| 73 Zn  | Zn73  | 0.61029  | 0.85563 | 0.07259  | 1.000 | 0.000 | 1a | 1 |
| 74 Zn  | Zn74  | 0.86070  | 0.93803 | 0.10409  | 1.000 | 0.000 | 1a | 1 |
| 75 O   | O75   | 0.60324  | 0.86212 | -0.00651 | 1.000 | 0.000 | 1a | 1 |
| 76 O   | O76   | 0.85006  | 0.96261 | -0.03450 | 1.000 | 0.000 | 1a | 1 |
| 77 Zn  | Zn77  | 0.51769  | 0.95834 | -0.02693 | 1.000 | 0.000 | 1a | 1 |
| 78 Zn  | Zn78  | 0.78109  | 0.85869 | -0.01390 | 1.000 | 0.000 | 1a | 1 |
| 79 O   | O79   | 0.53971  | 0.94328 | 0.11583  | 1.000 | 0.000 | 1a | 1 |
| 80 O   | O80   | 0.78505  | 0.85385 | 0.06569  | 1.000 | 0.000 | 1a | 1 |
| 81 In  | In81  | 0.01063  | 0.14164 | 0.20320  | 1.000 | 0.000 | 1a | 1 |
| 82 In  | In82  | 0.26388  | 0.25169 | 0.19553  | 1.000 | 0.000 | 1a | 1 |
| 83 In  | In83  | 0.28245  | 0.00961 | 0.22320  | 1.000 | 0.000 | 1a | 1 |
| 84 In  | In84  | 0.00909  | 0.39792 | 0.19002  | 1.000 | 0.000 | 1a | 1 |
| 85 O   | O85   | 0.18062  | 0.09133 | 0.18162  | 1.000 | 0.000 | 1a | 1 |
| 86 O   | O86   | -0.03383 | 0.01988 | 0.22887  | 1.000 | 0.000 | 1a | 1 |
| 87 O   | O87   | 0.11611  | 0.46654 | 0.23269  | 1.000 | 0.000 | 1a | 1 |
| 88 O   | O88   | 0.32816  | 0.37367 | 0.18771  | 1.000 | 0.000 | 1a | 1 |
| 89 O   | O89   | 0.35421  | 0.17269 | 0.23912  | 1.000 | 0.000 | 1a | 1 |
| 90 O   | O90   | 0.07845  | 0.26788 | 0.19292  | 1.000 | 0.000 | 1a | 1 |
| 91 In  | In91  | 0.51063  | 0.14164 | 0.20320  | 1.000 | 0.000 | 1a | 1 |
| 92 In  | In92  | 0.76388  | 0.25169 | 0.19553  | 1.000 | 0.000 | 1a | 1 |
| 93 In  | In93  | 0.78245  | 0.00961 | 0.22320  | 1.000 | 0.000 | 1a | 1 |
| 94 In  | In94  | 0.50909  | 0.39792 | 0.19002  | 1.000 | 0.000 | 1a | 1 |
| 95 O   | O95   | 0.68062  | 0.09133 | 0.18162  | 1.000 | 0.000 | 1a | 1 |
| 96 O   | O96   | 0.46617  | 0.01988 | 0.22887  | 1.000 | 0.000 | 1a | 1 |
| 97 O   | O97   | 0.61611  | 0.46654 | 0.23269  | 1.000 | 0.000 | 1a | 1 |
| 98 O   | O98   | 0.82816  | 0.37367 | 0.18771  | 1.000 | 0.000 | 1a | 1 |
| 99 O   | O99   | 0.85421  | 0.17269 | 0.23912  | 1.000 | 0.000 | 1a | 1 |
| 100 O  | O100  | 0.57845  | 0.26788 | 0.19292  | 1.000 | 0.000 | 1a | 1 |
| 101 In | In101 | -0.00592 | 0.66208 | 0.19439  | 1.000 | 0.000 | 1a | 1 |
| 102 In | In102 | 0.25249  | 0.79974 | 0.21180  | 1.000 | 0.000 | 1a | 1 |
| 103 In | In103 | 0.24028  | 0.51105 | 0.18504  | 1.000 | 0.000 | 1a | 1 |
| 104 In | In104 | 0.02724  | 0.90913 | 0.19453  | 1.000 | 0.000 | 1a | 1 |
| 105 O  | O105  | 0.15393  | 0.62479 | 0.16284  | 1.000 | 0.000 | 1a | 1 |

|        |       |          |         |         |       |       |    |   |
|--------|-------|----------|---------|---------|-------|-------|----|---|
| 106 O  | O106  | -0.08508 | 0.54770 | 0.16855 | 1.000 | 0.000 | 1a | 1 |
| 107 O  | O107  | 0.17526  | 0.91056 | 0.24673 | 1.000 | 0.000 | 1a | 1 |
| 108 O  | O108  | 0.34006  | 0.90102 | 0.17428 | 1.000 | 0.000 | 1a | 1 |
| 109 O  | O109  | 0.35701  | 0.70681 | 0.23632 | 1.000 | 0.000 | 1a | 1 |
| 110 O  | O110  | 0.07856  | 0.78448 | 0.18557 | 1.000 | 0.000 | 1a | 1 |
| 111 In | In111 | 0.49408  | 0.66208 | 0.19439 | 1.000 | 0.000 | 1a | 1 |
| 112 In | In112 | 0.75249  | 0.79974 | 0.21180 | 1.000 | 0.000 | 1a | 1 |
| 113 In | In113 | 0.74028  | 0.51105 | 0.18504 | 1.000 | 0.000 | 1a | 1 |
| 114 In | In114 | 0.52724  | 0.90913 | 0.19453 | 1.000 | 0.000 | 1a | 1 |
| 115 O  | O115  | 0.65393  | 0.62479 | 0.16284 | 1.000 | 0.000 | 1a | 1 |
| 116 O  | O116  | 0.41492  | 0.54770 | 0.16855 | 1.000 | 0.000 | 1a | 1 |
| 117 O  | O117  | 0.67526  | 0.91056 | 0.24673 | 1.000 | 0.000 | 1a | 1 |
| 118 O  | O118  | 0.84006  | 0.90102 | 0.17428 | 1.000 | 0.000 | 1a | 1 |
| 119 O  | O119  | 0.85701  | 0.70681 | 0.23632 | 1.000 | 0.000 | 1a | 1 |
| 120 O  | O120  | 0.57856  | 0.78448 | 0.18557 | 1.000 | 0.000 | 1a | 1 |

# H<sub>2</sub>S/In<sub>2</sub>O<sub>3</sub>-ZnO

Title H<sub>2</sub>S/In<sub>2</sub>O<sub>3</sub>-ZnO

Lattice type P  
Space group name P 1  
Space group number 1  
Setting number 1

Lattice parameters

| a        | b        | c        | alpha   | beta    | gamma   |
|----------|----------|----------|---------|---------|---------|
| 11.14410 | 16.13730 | 27.43750 | 90.0000 | 90.0000 | 90.0000 |

Unit-cell volume = 4934.241839 Å<sup>3</sup>

Structure parameters

|       |      | x       | y       | z        | Occ.  | U     | Site | Sym. |
|-------|------|---------|---------|----------|-------|-------|------|------|
| 1 Zn  | Zn1  | 0.12336 | 0.05088 | 0.11521  | 1.000 | 0.000 | 1a   | 1    |
| 2 Zn  | Zn2  | 0.33426 | 0.16117 | 0.09422  | 1.000 | 0.000 | 1a   | 1    |
| 3 O   | O3   | 0.11464 | 0.06217 | -0.01979 | 1.000 | 0.000 | 1a   | 1    |
| 4 O   | O4   | 0.35036 | 0.16368 | 0.01795  | 1.000 | 0.000 | 1a   | 1    |
| 5 Zn  | Zn5  | 0.03070 | 0.15352 | 0.00114  | 1.000 | 0.000 | 1a   | 1    |
| 6 Zn  | Zn6  | 0.27385 | 0.04848 | 0.00839  | 1.000 | 0.000 | 1a   | 1    |
| 7 O   | O7   | 0.00985 | 0.14853 | 0.11863  | 1.000 | 0.000 | 1a   | 1    |
| 8 O   | O8   | 0.27900 | 0.04562 | 0.08310  | 1.000 | 0.000 | 1a   | 1    |
| 9 Zn  | Zn9  | 0.08860 | 0.26058 | 0.11041  | 1.000 | 0.000 | 1a   | 1    |
| 10 Zn | Zn10 | 0.37133 | 0.36747 | 0.11751  | 1.000 | 0.000 | 1a   | 1    |
| 11 O  | O11  | 0.10230 | 0.25465 | 0.02708  | 1.000 | 0.000 | 1a   | 1    |
| 12 O  | O12  | 0.35099 | 0.34412 | -0.03182 | 1.000 | 0.000 | 1a   | 1    |
| 13 Zn | Zn13 | 0.01583 | 0.35480 | 0.00896  | 1.000 | 0.000 | 1a   | 1    |
| 14 Zn | Zn14 | 0.26293 | 0.26310 | 0.00093  | 1.000 | 0.000 | 1a   | 1    |
| 15 O  | O15  | 0.00987 | 0.37323 | 0.10689  | 1.000 | 0.000 | 1a   | 1    |
| 16 O  | O16  | 0.26673 | 0.26430 | 0.12381  | 1.000 | 0.000 | 1a   | 1    |
| 17 Zn | Zn17 | 0.11909 | 0.46140 | 0.07399  | 1.000 | 0.000 | 1a   | 1    |
| 18 Zn | Zn18 | 0.37442 | 0.56495 | 0.09034  | 1.000 | 0.000 | 1a   | 1    |
| 19 O  | O19  | 0.11860 | 0.44726 | -0.00187 | 1.000 | 0.000 | 1a   | 1    |
| 20 O  | O20  | 0.36042 | 0.55160 | -0.04117 | 1.000 | 0.000 | 1a   | 1    |
| 21 Zn | Zn21 | 0.02754 | 0.56027 | -0.01013 | 1.000 | 0.000 | 1a   | 1    |
| 22 Zn | Zn22 | 0.28111 | 0.45315 | -0.02921 | 1.000 | 0.000 | 1a   | 1    |
| 23 O  | O23  | 0.02325 | 0.55947 | 0.06536  | 1.000 | 0.000 | 1a   | 1    |
| 24 O  | O24  | 0.26934 | 0.46521 | 0.10708  | 1.000 | 0.000 | 1a   | 1    |
| 25 Zn | Zn25 | 0.12129 | 0.65155 | 0.09623  | 1.000 | 0.000 | 1a   | 1    |

|       |      |          |         |          |       |       |    |   |
|-------|------|----------|---------|----------|-------|-------|----|---|
| 26 Zn | Zn26 | 0.36203  | 0.74960 | 0.06370  | 1.000 | 0.000 | 1a | 1 |
| 27 O  | O27  | 0.10979  | 0.65343 | -0.03782 | 1.000 | 0.000 | 1a | 1 |
| 28 O  | O28  | 0.36414  | 0.75621 | -0.01585 | 1.000 | 0.000 | 1a | 1 |
| 29 Zn | Zn29 | 0.03868  | 0.75106 | -0.01242 | 1.000 | 0.000 | 1a | 1 |
| 30 Zn | Zn30 | 0.27583  | 0.65039 | -0.01959 | 1.000 | 0.000 | 1a | 1 |
| 31 O  | O31  | 0.03459  | 0.74784 | 0.07150  | 1.000 | 0.000 | 1a | 1 |
| 32 O  | O32  | 0.27204  | 0.64753 | 0.06045  | 1.000 | 0.000 | 1a | 1 |
| 33 Zn | Zn33 | 0.11108  | 0.85519 | 0.07392  | 1.000 | 0.000 | 1a | 1 |
| 34 Zn | Zn34 | 0.36219  | 0.94287 | 0.10640  | 1.000 | 0.000 | 1a | 1 |
| 35 O  | O35  | 0.10610  | 0.86366 | -0.00452 | 1.000 | 0.000 | 1a | 1 |
| 36 O  | O36  | 0.35393  | 0.96658 | -0.03053 | 1.000 | 0.000 | 1a | 1 |
| 37 Zn | Zn37 | 0.02290  | 0.96191 | -0.02425 | 1.000 | 0.000 | 1a | 1 |
| 38 Zn | Zn38 | 0.28387  | 0.86230 | -0.01136 | 1.000 | 0.000 | 1a | 1 |
| 39 O  | O39  | 0.03891  | 0.94450 | 0.11538  | 1.000 | 0.000 | 1a | 1 |
| 40 O  | O40  | 0.28643  | 0.85774 | 0.06879  | 1.000 | 0.000 | 1a | 1 |
| 41 Zn | Zn41 | 0.61896  | 0.05861 | 0.11405  | 1.000 | 0.000 | 1a | 1 |
| 42 Zn | Zn42 | 0.85392  | 0.14855 | 0.08668  | 1.000 | 0.000 | 1a | 1 |
| 43 O  | O43  | 0.60876  | 0.06124 | -0.02591 | 1.000 | 0.000 | 1a | 1 |
| 44 O  | O44  | 0.86021  | 0.15864 | 0.01055  | 1.000 | 0.000 | 1a | 1 |
| 45 Zn | Zn45 | 0.50948  | 0.14569 | -0.00522 | 1.000 | 0.000 | 1a | 1 |
| 46 Zn | Zn46 | 0.76893  | 0.04945 | 0.00079  | 1.000 | 0.000 | 1a | 1 |
| 47 O  | O47  | 0.50165  | 0.15698 | 0.11866  | 1.000 | 0.000 | 1a | 1 |
| 48 O  | O48  | 0.76986  | 0.04353 | 0.07794  | 1.000 | 0.000 | 1a | 1 |
| 49 Zn | Zn49 | 0.58890  | 0.25162 | 0.08883  | 1.000 | 0.000 | 1a | 1 |
| 50 Zn | Zn50 | 0.83234  | 0.36012 | 0.09496  | 1.000 | 0.000 | 1a | 1 |
| 51 O  | O51  | 0.59915  | 0.24576 | 0.01168  | 1.000 | 0.000 | 1a | 1 |
| 52 O  | O52  | 0.84501  | 0.35951 | 0.01462  | 1.000 | 0.000 | 1a | 1 |
| 53 Zn | Zn53 | 0.50600  | 0.34868 | -0.00157 | 1.000 | 0.000 | 1a | 1 |
| 54 Zn | Zn54 | 0.76623  | 0.25607 | 0.00188  | 1.000 | 0.000 | 1a | 1 |
| 55 O  | O55  | 0.50989  | 0.35770 | 0.07729  | 1.000 | 0.000 | 1a | 1 |
| 56 O  | O56  | 0.76202  | 0.24895 | 0.11055  | 1.000 | 0.000 | 1a | 1 |
| 57 Zn | Zn57 | 0.60222  | 0.46136 | 0.06651  | 1.000 | 0.000 | 1a | 1 |
| 58 Zn | Zn58 | 0.86949  | 0.55637 | 0.09680  | 1.000 | 0.000 | 1a | 1 |
| 59 O  | O59  | 0.60698  | 0.44637 | -0.01047 | 1.000 | 0.000 | 1a | 1 |
| 60 O  | O60  | 0.86923  | 0.54634 | -0.03864 | 1.000 | 0.000 | 1a | 1 |
| 61 Zn | Zn61 | 0.52394  | 0.56134 | -0.01897 | 1.000 | 0.000 | 1a | 1 |
| 62 Zn | Zn62 | 0.77404  | 0.45923 | -0.01985 | 1.000 | 0.000 | 1a | 1 |
| 63 O  | O63  | 0.52537  | 0.56564 | 0.05717  | 1.000 | 0.000 | 1a | 1 |
| 64 O  | O64  | 0.74696  | 0.46417 | 0.10575  | 1.000 | 0.000 | 1a | 1 |
| 65 Zn | Zn65 | 0.62410  | 0.65170 | 0.09256  | 1.000 | 0.000 | 1a | 1 |
| 66 Zn | Zn66 | 0.86206  | 0.74745 | 0.06369  | 1.000 | 0.000 | 1a | 1 |
| 67 O  | O67  | 0.61610  | 0.65543 | -0.03952 | 1.000 | 0.000 | 1a | 1 |
| 68 O  | O68  | 0.86311  | 0.75471 | -0.01590 | 1.000 | 0.000 | 1a | 1 |
| 69 Zn | Zn69 | 0.54016  | 0.74992 | -0.01187 | 1.000 | 0.000 | 1a | 1 |
| 70 Zn | Zn70 | 0.78141  | 0.64734 | -0.02058 | 1.000 | 0.000 | 1a | 1 |
| 71 O  | O71  | 0.53436  | 0.74999 | 0.07244  | 1.000 | 0.000 | 1a | 1 |
| 72 O  | O72  | 0.78189  | 0.64186 | 0.06178  | 1.000 | 0.000 | 1a | 1 |
| 73 Zn | Zn73 | 0.61111  | 0.85748 | 0.07527  | 1.000 | 0.000 | 1a | 1 |
| 74 Zn | Zn74 | 0.85900  | 0.94434 | 0.10325  | 1.000 | 0.000 | 1a | 1 |
| 75 O  | O75  | 0.60646  | 0.86298 | -0.00400 | 1.000 | 0.000 | 1a | 1 |
| 76 O  | O76  | 0.85535  | 0.96381 | -0.03239 | 1.000 | 0.000 | 1a | 1 |
| 77 Zn | Zn77 | 0.52190  | 0.95817 | -0.02552 | 1.000 | 0.000 | 1a | 1 |
| 78 Zn | Zn78 | 0.78395  | 0.86109 | -0.01144 | 1.000 | 0.000 | 1a | 1 |
| 79 O  | O79  | 0.54090  | 0.94919 | 0.11702  | 1.000 | 0.000 | 1a | 1 |
| 80 O  | O80  | 0.78594  | 0.85526 | 0.06791  | 1.000 | 0.000 | 1a | 1 |
| 81 In | In81 | 0.02256  | 0.14326 | 0.20199  | 1.000 | 0.000 | 1a | 1 |
| 82 In | In82 | 0.23713  | 0.30595 | 0.20315  | 1.000 | 0.000 | 1a | 1 |
| 83 In | In83 | 0.26977  | 0.00077 | 0.22215  | 1.000 | 0.000 | 1a | 1 |
| 84 In | In84 | -0.01600 | 0.40858 | 0.18536  | 1.000 | 0.000 | 1a | 1 |
| 85 O  | O85  | 0.18975  | 0.09146 | 0.18110  | 1.000 | 0.000 | 1a | 1 |
| 86 O  | O86  | -0.02360 | 0.02041 | 0.22677  | 1.000 | 0.000 | 1a | 1 |
| 87 O  | O87  | 0.14682  | 0.42857 | 0.21895  | 1.000 | 0.000 | 1a | 1 |

|        |       |          |         |         |       |       |    |   |
|--------|-------|----------|---------|---------|-------|-------|----|---|
| 88 O   | O88   | 0.37752  | 0.39226 | 0.19118 | 1.000 | 0.000 | 1a | 1 |
| 89 O   | O89   | 0.33324  | 0.20703 | 0.23810 | 1.000 | 0.000 | 1a | 1 |
| 90 O   | O90   | 0.05889  | 0.27236 | 0.19240 | 1.000 | 0.000 | 1a | 1 |
| 91 In  | In91  | 0.49310  | 0.15348 | 0.19952 | 1.000 | 0.000 | 1a | 1 |
| 92 In  | In92  | 0.75958  | 0.24520 | 0.19136 | 1.000 | 0.000 | 1a | 1 |
| 93 In  | In93  | 0.78928  | 0.02764 | 0.22239 | 1.000 | 0.000 | 1a | 1 |
| 94 In  | In94  | 0.52253  | 0.38144 | 0.24229 | 1.000 | 0.000 | 1a | 1 |
| 95 O   | O95   | 0.66840  | 0.09915 | 0.18062 | 1.000 | 0.000 | 1a | 1 |
| 96 O   | O96   | 0.44806  | 0.03590 | 0.22757 | 1.000 | 0.000 | 1a | 1 |
| 97 O   | O97   | 0.60939  | 0.49051 | 0.24085 | 1.000 | 0.000 | 1a | 1 |
| 98 O   | O98   | 0.80789  | 0.37269 | 0.19260 | 1.000 | 0.000 | 1a | 1 |
| 99 O   | O99   | 0.85422  | 0.16344 | 0.23394 | 1.000 | 0.000 | 1a | 1 |
| 100 O  | O100  | 0.58305  | 0.26652 | 0.21186 | 1.000 | 0.000 | 1a | 1 |
| 101 In | In101 | -0.01826 | 0.66292 | 0.19453 | 1.000 | 0.000 | 1a | 1 |
| 102 In | In102 | 0.25143  | 0.79521 | 0.21197 | 1.000 | 0.000 | 1a | 1 |
| 103 In | In103 | 0.25853  | 0.51388 | 0.18302 | 1.000 | 0.000 | 1a | 1 |
| 104 In | In104 | 0.02209  | 0.90556 | 0.19346 | 1.000 | 0.000 | 1a | 1 |
| 105 O  | O105  | 0.14105  | 0.61644 | 0.16729 | 1.000 | 0.000 | 1a | 1 |
| 106 O  | O106  | -0.09403 | 0.53890 | 0.17408 | 1.000 | 0.000 | 1a | 1 |
| 107 O  | O107  | 0.16809  | 0.90235 | 0.24734 | 1.000 | 0.000 | 1a | 1 |
| 108 O  | O108  | 0.34378  | 0.90049 | 0.17678 | 1.000 | 0.000 | 1a | 1 |
| 109 O  | O109  | 0.36549  | 0.71256 | 0.24038 | 1.000 | 0.000 | 1a | 1 |
| 110 O  | O110  | 0.07878  | 0.78162 | 0.18259 | 1.000 | 0.000 | 1a | 1 |
| 111 In | In111 | 0.50307  | 0.67333 | 0.19554 | 1.000 | 0.000 | 1a | 1 |
| 112 In | In112 | 0.75274  | 0.81341 | 0.21442 | 1.000 | 0.000 | 1a | 1 |
| 113 In | In113 | 0.71877  | 0.50514 | 0.18255 | 1.000 | 0.000 | 1a | 1 |
| 114 In | In114 | 0.52976  | 0.92325 | 0.19648 | 1.000 | 0.000 | 1a | 1 |
| 115 O  | O115  | 0.66013  | 0.62831 | 0.16297 | 1.000 | 0.000 | 1a | 1 |
| 116 O  | O116  | 0.40904  | 0.57713 | 0.16162 | 1.000 | 0.000 | 1a | 1 |
| 117 O  | O117  | 0.67748  | 0.92885 | 0.24694 | 1.000 | 0.000 | 1a | 1 |
| 118 O  | O118  | 0.83708  | 0.90961 | 0.17379 | 1.000 | 0.000 | 1a | 1 |
| 119 O  | O119  | 0.85669  | 0.71843 | 0.23762 | 1.000 | 0.000 | 1a | 1 |
| 120 O  | O120  | 0.58104  | 0.79626 | 0.18843 | 1.000 | 0.000 | 1a | 1 |
| 121 S  | S121  | -0.56455 | 0.32977 | 0.31996 | 1.000 | 0.000 | 1a | 1 |
| 122 H  | H122  | -0.46901 | 0.27776 | 0.32598 | 1.000 | 0.000 | 1a | 1 |
| 123 H  | H123  | -0.63315 | 0.23420 | 0.26823 | 1.000 | 0.000 | 1a | 1 |

# SO<sub>2</sub>/In<sub>2</sub>O<sub>3</sub>-ZnO

Title SO<sub>2</sub>/In<sub>2</sub>O<sub>3</sub>-ZnO

Lattice type P  
Space group name P 1  
Space group number 1  
Setting number 1

Lattice parameters

| a        | b        | c        | alpha   | beta    | gamma   |
|----------|----------|----------|---------|---------|---------|
| 11.14410 | 16.13730 | 27.43750 | 90.0000 | 90.0000 | 90.0000 |

Unit-cell volume = 4934.241839 Å<sup>3</sup>

Structure parameters

|      |     | x       | y       | z        | Occ.  | U     | Site | Sym. |
|------|-----|---------|---------|----------|-------|-------|------|------|
| 1 Zn | Zn1 | 0.11324 | 0.05464 | 0.11820  | 1.000 | 0.000 | 1a   | 1    |
| 2 Zn | Zn2 | 0.35256 | 0.14183 | 0.08886  | 1.000 | 0.000 | 1a   | 1    |
| 3 O  | O3  | 0.09882 | 0.05304 | -0.01754 | 1.000 | 0.000 | 1a   | 1    |

|       |      |          |         |          |       |       |    |   |
|-------|------|----------|---------|----------|-------|-------|----|---|
| 4 O   | O4   | 0.34746  | 0.15279 | 0.01266  | 1.000 | 0.000 | 1a | 1 |
| 5 Zn  | Zn5  | 0.00347  | 0.14251 | -0.00123 | 1.000 | 0.000 | 1a | 1 |
| 6 Zn  | Zn6  | 0.26132  | 0.04327 | 0.00620  | 1.000 | 0.000 | 1a | 1 |
| 7 O   | O7   | -0.00959 | 0.14807 | 0.12241  | 1.000 | 0.000 | 1a | 1 |
| 8 O   | O8   | 0.26504  | 0.03727 | 0.08298  | 1.000 | 0.000 | 1a | 1 |
| 9 Zn  | Zn9  | 0.06821  | 0.25072 | 0.09728  | 1.000 | 0.000 | 1a | 1 |
| 10 Zn | Zn10 | 0.32189  | 0.35705 | 0.10408  | 1.000 | 0.000 | 1a | 1 |
| 11 O  | O11  | 0.07961  | 0.24734 | 0.02057  | 1.000 | 0.000 | 1a | 1 |
| 12 O  | O12  | 0.33167  | 0.35688 | 0.02005  | 1.000 | 0.000 | 1a | 1 |
| 13 Zn | Zn13 | -0.00135 | 0.34193 | -0.01071 | 1.000 | 0.000 | 1a | 1 |
| 14 Zn | Zn14 | 0.25278  | 0.25140 | 0.01580  | 1.000 | 0.000 | 1a | 1 |
| 15 O  | O15  | 0.01396  | 0.36418 | 0.11328  | 1.000 | 0.000 | 1a | 1 |
| 16 O  | O16  | 0.25000  | 0.24081 | 0.10812  | 1.000 | 0.000 | 1a | 1 |
| 17 Zn | Zn17 | 0.08599  | 0.45208 | 0.07033  | 1.000 | 0.000 | 1a | 1 |
| 18 Zn | Zn18 | 0.35985  | 0.54908 | 0.09027  | 1.000 | 0.000 | 1a | 1 |
| 19 O  | O19  | 0.09608  | 0.43857 | -0.00596 | 1.000 | 0.000 | 1a | 1 |
| 20 O  | O20  | 0.35581  | 0.53840 | -0.04130 | 1.000 | 0.000 | 1a | 1 |
| 21 Zn | Zn21 | 0.01374  | 0.55457 | -0.01902 | 1.000 | 0.000 | 1a | 1 |
| 22 Zn | Zn22 | 0.26589  | 0.45303 | -0.01571 | 1.000 | 0.000 | 1a | 1 |
| 23 O  | O23  | 0.01627  | 0.55953 | 0.05558  | 1.000 | 0.000 | 1a | 1 |
| 24 O  | O24  | 0.23734  | 0.46522 | 0.10628  | 1.000 | 0.000 | 1a | 1 |
| 25 Zn | Zn25 | 0.11934  | 0.64345 | 0.08755  | 1.000 | 0.000 | 1a | 1 |
| 26 Zn | Zn26 | 0.35570  | 0.73845 | 0.06213  | 1.000 | 0.000 | 1a | 1 |
| 27 O  | O27  | 0.10562  | 0.64687 | -0.04496 | 1.000 | 0.000 | 1a | 1 |
| 28 O  | O28  | 0.35256  | 0.74986 | -0.01831 | 1.000 | 0.000 | 1a | 1 |
| 29 Zn | Zn29 | 0.02826  | 0.74501 | -0.02668 | 1.000 | 0.000 | 1a | 1 |
| 30 Zn | Zn30 | 0.27241  | 0.64215 | -0.02494 | 1.000 | 0.000 | 1a | 1 |
| 31 O  | O31  | 0.00977  | 0.74077 | 0.10186  | 1.000 | 0.000 | 1a | 1 |
| 32 O  | O32  | 0.27076  | 0.63542 | 0.05445  | 1.000 | 0.000 | 1a | 1 |
| 33 Zn | Zn33 | 0.09696  | 0.84310 | 0.08168  | 1.000 | 0.000 | 1a | 1 |
| 34 Zn | Zn34 | 0.34609  | 0.93378 | 0.10481  | 1.000 | 0.000 | 1a | 1 |
| 35 O  | O35  | 0.08840  | 0.84889 | 0.00213  | 1.000 | 0.000 | 1a | 1 |
| 36 O  | O36  | 0.34026  | 0.95508 | -0.02747 | 1.000 | 0.000 | 1a | 1 |
| 37 Zn | Zn37 | 0.01214  | 0.95096 | -0.01879 | 1.000 | 0.000 | 1a | 1 |
| 38 Zn | Zn38 | 0.26833  | 0.85308 | -0.00661 | 1.000 | 0.000 | 1a | 1 |
| 39 O  | O39  | 0.03754  | 0.94266 | 0.12076  | 1.000 | 0.000 | 1a | 1 |
| 40 O  | O40  | 0.27034  | 0.84262 | 0.07142  | 1.000 | 0.000 | 1a | 1 |
| 41 Zn | Zn41 | 0.61570  | 0.04517 | 0.11273  | 1.000 | 0.000 | 1a | 1 |
| 42 Zn | Zn42 | 0.83098  | 0.14305 | 0.09174  | 1.000 | 0.000 | 1a | 1 |
| 43 O  | O43  | 0.59853  | 0.05479 | -0.02230 | 1.000 | 0.000 | 1a | 1 |
| 44 O  | O44  | 0.83956  | 0.15231 | 0.01399  | 1.000 | 0.000 | 1a | 1 |
| 45 Zn | Zn45 | 0.51779  | 0.14900 | -0.00298 | 1.000 | 0.000 | 1a | 1 |
| 46 Zn | Zn46 | 0.76158  | 0.04212 | 0.00224  | 1.000 | 0.000 | 1a | 1 |
| 47 O  | O47  | 0.50945  | 0.14862 | 0.11927  | 1.000 | 0.000 | 1a | 1 |
| 48 O  | O48  | 0.76943  | 0.03120 | 0.07907  | 1.000 | 0.000 | 1a | 1 |
| 49 Zn | Zn49 | 0.58809  | 0.25903 | 0.10644  | 1.000 | 0.000 | 1a | 1 |
| 50 Zn | Zn50 | 0.83034  | 0.36036 | 0.12036  | 1.000 | 0.000 | 1a | 1 |
| 51 O  | O51  | 0.58103  | 0.24959 | 0.02342  | 1.000 | 0.000 | 1a | 1 |
| 52 O  | O52  | 0.83548  | 0.33693 | -0.02555 | 1.000 | 0.000 | 1a | 1 |
| 53 Zn | Zn53 | 0.50119  | 0.35170 | 0.00917  | 1.000 | 0.000 | 1a | 1 |
| 54 Zn | Zn54 | 0.75618  | 0.26004 | 0.01692  | 1.000 | 0.000 | 1a | 1 |
| 55 O  | O55  | 0.50725  | 0.37067 | 0.10684  | 1.000 | 0.000 | 1a | 1 |
| 56 O  | O56  | 0.76374  | 0.25790 | 0.09448  | 1.000 | 0.000 | 1a | 1 |
| 57 Zn | Zn57 | 0.61061  | 0.46248 | 0.07377  | 1.000 | 0.000 | 1a | 1 |
| 58 Zn | Zn58 | 0.86621  | 0.55390 | 0.09127  | 1.000 | 0.000 | 1a | 1 |
| 59 O  | O59  | 0.60507  | 0.44353 | -0.00259 | 1.000 | 0.000 | 1a | 1 |
| 60 O  | O60  | 0.85150  | 0.54322 | -0.04266 | 1.000 | 0.000 | 1a | 1 |
| 61 Zn | Zn61 | 0.51633  | 0.55452 | -0.01455 | 1.000 | 0.000 | 1a | 1 |
| 62 Zn | Zn62 | 0.76829  | 0.44657 | -0.02797 | 1.000 | 0.000 | 1a | 1 |
| 63 O  | O63  | 0.51318  | 0.55863 | 0.06113  | 1.000 | 0.000 | 1a | 1 |
| 64 O  | O64  | 0.75468  | 0.46591 | 0.11001  | 1.000 | 0.000 | 1a | 1 |
| 65 Zn | Zn65 | 0.61522  | 0.64750 | 0.09236  | 1.000 | 0.000 | 1a | 1 |

|        |       |          |          |          |       |       |    |   |
|--------|-------|----------|----------|----------|-------|-------|----|---|
| 66 Zn  | Zn66  | 0.85941  | 0.74132  | 0.06382  | 1.000 | 0.000 | 1a | 1 |
| 67 O   | O67   | 0.60216  | 0.64865  | -0.03958 | 1.000 | 0.000 | 1a | 1 |
| 68 O   | O68   | 0.85845  | 0.74772  | -0.01396 | 1.000 | 0.000 | 1a | 1 |
| 69 Zn  | Zn69  | 0.52889  | 0.74565  | -0.01403 | 1.000 | 0.000 | 1a | 1 |
| 70 Zn  | Zn70  | 0.76619  | 0.64087  | -0.01856 | 1.000 | 0.000 | 1a | 1 |
| 71 O   | O71   | 0.52683  | 0.74353  | 0.06897  | 1.000 | 0.000 | 1a | 1 |
| 72 O   | O72   | 0.76931  | 0.63895  | 0.05926  | 1.000 | 0.000 | 1a | 1 |
| 73 Zn  | Zn73  | 0.60454  | 0.85064  | 0.07296  | 1.000 | 0.000 | 1a | 1 |
| 74 Zn  | Zn74  | 0.85694  | 0.93443  | 0.10765  | 1.000 | 0.000 | 1a | 1 |
| 75 O   | O75   | 0.59819  | 0.85730  | -0.00559 | 1.000 | 0.000 | 1a | 1 |
| 76 O   | O76   | 0.84687  | 0.95645  | -0.03258 | 1.000 | 0.000 | 1a | 1 |
| 77 Zn  | Zn77  | 0.50897  | 0.95388  | -0.02367 | 1.000 | 0.000 | 1a | 1 |
| 78 Zn  | Zn78  | 0.77554  | 0.85493  | -0.01041 | 1.000 | 0.000 | 1a | 1 |
| 79 O   | O79   | 0.52808  | 0.93985  | 0.11274  | 1.000 | 0.000 | 1a | 1 |
| 80 O   | O80   | 0.78112  | 0.84912  | 0.06870  | 1.000 | 0.000 | 1a | 1 |
| 81 In  | In81  | -0.01828 | 0.14852  | 0.20511  | 1.000 | 0.000 | 1a | 1 |
| 82 In  | In82  | 0.25226  | 0.23349  | 0.19034  | 1.000 | 0.000 | 1a | 1 |
| 83 In  | In83  | 0.29499  | 0.02864  | 0.22398  | 1.000 | 0.000 | 1a | 1 |
| 84 In  | In84  | 0.02809  | 0.38650  | 0.19449  | 1.000 | 0.000 | 1a | 1 |
| 85 O   | O85   | 0.16491  | 0.09926  | 0.18491  | 1.000 | 0.000 | 1a | 1 |
| 86 O   | O86   | -0.05381 | 0.02642  | 0.23083  | 1.000 | 0.000 | 1a | 1 |
| 87 O   | O87   | 0.11835  | 0.47186  | 0.23290  | 1.000 | 0.000 | 1a | 1 |
| 88 O   | O88   | 0.31677  | 0.35683  | 0.18265  | 1.000 | 0.000 | 1a | 1 |
| 89 O   | O89   | 0.36432  | 0.16293  | 0.23285  | 1.000 | 0.000 | 1a | 1 |
| 90 O   | O90   | 0.07645  | 0.26314  | 0.20920  | 1.000 | 0.000 | 1a | 1 |
| 91 In  | In91  | 0.53324  | 0.14664  | 0.20031  | 1.000 | 0.000 | 1a | 1 |
| 92 In  | In92  | 0.75432  | 0.29062  | 0.23119  | 1.000 | 0.000 | 1a | 1 |
| 93 In  | In93  | 0.76683  | -0.00134 | 0.22164  | 1.000 | 0.000 | 1a | 1 |
| 94 In  | In94  | 0.49042  | 0.40084  | 0.18410  | 1.000 | 0.000 | 1a | 1 |
| 95 O   | O95   | 0.69298  | 0.08647  | 0.17578  | 1.000 | 0.000 | 1a | 1 |
| 96 O   | O96   | 0.48244  | 0.02117  | 0.22251  | 1.000 | 0.000 | 1a | 1 |
| 97 O   | O97   | 0.60763  | 0.47258  | 0.22882  | 1.000 | 0.000 | 1a | 1 |
| 98 O   | O98   | 0.84125  | 0.38418  | 0.19351  | 1.000 | 0.000 | 1a | 1 |
| 99 O   | O99   | 0.83268  | 0.18187  | 0.24637  | 1.000 | 0.000 | 1a | 1 |
| 100 O  | O100  | 0.58865  | 0.27788  | 0.19357  | 1.000 | 0.000 | 1a | 1 |
| 101 In | In101 | 0.00188  | 0.68371  | 0.17860  | 1.000 | 0.000 | 1a | 1 |
| 102 In | In102 | 0.25414  | 0.81208  | 0.22288  | 1.000 | 0.000 | 1a | 1 |
| 103 In | In103 | 0.22380  | 0.52237  | 0.18145  | 1.000 | 0.000 | 1a | 1 |
| 104 In | In104 | 0.03073  | 0.92045  | 0.20098  | 1.000 | 0.000 | 1a | 1 |
| 105 O  | O105  | 0.17508  | 0.64120  | 0.15842  | 1.000 | 0.000 | 1a | 1 |
| 106 O  | O106  | -0.06387 | 0.56136  | 0.15953  | 1.000 | 0.000 | 1a | 1 |
| 107 O  | O107  | 0.18457  | 0.93189  | 0.25095  | 1.000 | 0.000 | 1a | 1 |
| 108 O  | O108  | 0.33146  | 0.90432  | 0.17601  | 1.000 | 0.000 | 1a | 1 |
| 109 O  | O109  | 0.35812  | 0.71311  | 0.24042  | 1.000 | 0.000 | 1a | 1 |
| 110 O  | O110  | 0.07286  | 0.79412  | 0.20951  | 1.000 | 0.000 | 1a | 1 |
| 111 In | In111 | 0.47665  | 0.66084  | 0.19277  | 1.000 | 0.000 | 1a | 1 |
| 112 In | In112 | 0.74233  | 0.79274  | 0.20795  | 1.000 | 0.000 | 1a | 1 |
| 113 In | In113 | 0.77448  | 0.55150  | 0.19576  | 1.000 | 0.000 | 1a | 1 |
| 114 In | In114 | 0.51814  | 0.90404  | 0.19146  | 1.000 | 0.000 | 1a | 1 |
| 115 O  | O115  | 0.63485  | 0.61787  | 0.16257  | 1.000 | 0.000 | 1a | 1 |
| 116 O  | O116  | 0.40889  | 0.53710  | 0.17069  | 1.000 | 0.000 | 1a | 1 |
| 117 O  | O117  | 0.66432  | 0.89827  | 0.24564  | 1.000 | 0.000 | 1a | 1 |
| 118 O  | O118  | 0.84301  | 0.89439  | 0.17755  | 1.000 | 0.000 | 1a | 1 |
| 119 O  | O119  | 0.83830  | 0.68719  | 0.21806  | 1.000 | 0.000 | 1a | 1 |
| 120 O  | O120  | 0.56918  | 0.78028  | 0.17913  | 1.000 | 0.000 | 1a | 1 |
| 121 S  | S121  | -0.33634 | 0.46308  | 0.28495  | 1.000 | 0.000 | 1a | 1 |
| 122 O  | O122  | -0.30574 | 0.36934  | 0.29145  | 1.000 | 0.000 | 1a | 1 |
| 123 O  | O123  | -0.22253 | 0.51646  | 0.27503  | 1.000 | 0.000 | 1a | 1 |

# SOF<sub>2</sub>/In<sub>2</sub>O<sub>3</sub>-ZnO

Title SOF<sub>2</sub>/In<sub>2</sub>O<sub>3</sub>-ZnO

Lattice type P  
Space group name P 1  
Space group number 1  
Setting number 1

Lattice parameters

|          |          |          |         |         |         |
|----------|----------|----------|---------|---------|---------|
| a        | b        | c        | alpha   | beta    | gamma   |
| 11.14410 | 16.13730 | 27.43750 | 90.0000 | 90.0000 | 90.0000 |

Unit-cell volume = 4934.241839 Å<sup>3</sup>

Structure parameters

|       |      | x       | y       | z        | Occ.  | U     | Site | Sym. |
|-------|------|---------|---------|----------|-------|-------|------|------|
| 1 Zn  | Zn1  | 0.12265 | 0.05310 | 0.11505  | 1.000 | 0.000 | 1a   | 1    |
| 2 Zn  | Zn2  | 0.34374 | 0.14764 | 0.08837  | 1.000 | 0.000 | 1a   | 1    |
| 3 O   | O3   | 0.10384 | 0.06348 | -0.02453 | 1.000 | 0.000 | 1a   | 1    |
| 4 O   | O4   | 0.34557 | 0.15969 | 0.01156  | 1.000 | 0.000 | 1a   | 1    |
| 5 Zn  | Zn5  | 0.01360 | 0.15063 | -0.00208 | 1.000 | 0.000 | 1a   | 1    |
| 6 Zn  | Zn6  | 0.26433 | 0.04765 | 0.00139  | 1.000 | 0.000 | 1a   | 1    |
| 7 O   | O7   | 0.00478 | 0.14728 | 0.12015  | 1.000 | 0.000 | 1a   | 1    |
| 8 O   | O8   | 0.27066 | 0.03937 | 0.07809  | 1.000 | 0.000 | 1a   | 1    |
| 9 Zn  | Zn9  | 0.08007 | 0.25766 | 0.10744  | 1.000 | 0.000 | 1a   | 1    |
| 10 Zn | Zn10 | 0.33026 | 0.36594 | 0.10194  | 1.000 | 0.000 | 1a   | 1    |
| 11 O  | O11  | 0.08389 | 0.25104 | 0.02604  | 1.000 | 0.000 | 1a   | 1    |
| 12 O  | O12  | 0.33553 | 0.36199 | 0.01774  | 1.000 | 0.000 | 1a   | 1    |
| 13 Zn | Zn13 | 0.00397 | 0.35247 | 0.00795  | 1.000 | 0.000 | 1a   | 1    |
| 14 Zn | Zn14 | 0.25295 | 0.25886 | 0.01461  | 1.000 | 0.000 | 1a   | 1    |
| 15 O  | O15  | 0.01455 | 0.37291 | 0.10928  | 1.000 | 0.000 | 1a   | 1    |
| 16 O  | O16  | 0.26214 | 0.25112 | 0.11229  | 1.000 | 0.000 | 1a   | 1    |
| 17 Zn | Zn17 | 0.09666 | 0.46588 | 0.07212  | 1.000 | 0.000 | 1a   | 1    |
| 18 Zn | Zn18 | 0.36673 | 0.56412 | 0.09317  | 1.000 | 0.000 | 1a   | 1    |
| 19 O  | O19  | 0.09982 | 0.44700 | -0.00505 | 1.000 | 0.000 | 1a   | 1    |
| 20 O  | O20  | 0.35637 | 0.54636 | -0.04159 | 1.000 | 0.000 | 1a   | 1    |
| 21 Zn | Zn21 | 0.01630 | 0.56225 | -0.01610 | 1.000 | 0.000 | 1a   | 1    |
| 22 Zn | Zn22 | 0.26880 | 0.45965 | -0.01663 | 1.000 | 0.000 | 1a   | 1    |
| 23 O  | O23  | 0.01340 | 0.56659 | 0.05944  | 1.000 | 0.000 | 1a   | 1    |
| 24 O  | O24  | 0.24868 | 0.47200 | 0.10440  | 1.000 | 0.000 | 1a   | 1    |
| 25 Zn | Zn25 | 0.11767 | 0.65459 | 0.09084  | 1.000 | 0.000 | 1a   | 1    |
| 26 Zn | Zn26 | 0.35791 | 0.74914 | 0.06044  | 1.000 | 0.000 | 1a   | 1    |
| 27 O  | O27  | 0.10624 | 0.65392 | -0.04122 | 1.000 | 0.000 | 1a   | 1    |
| 28 O  | O28  | 0.35863 | 0.75525 | -0.01946 | 1.000 | 0.000 | 1a   | 1    |
| 29 Zn | Zn29 | 0.03426 | 0.75162 | -0.01543 | 1.000 | 0.000 | 1a   | 1    |
| 30 Zn | Zn30 | 0.27246 | 0.64900 | -0.02311 | 1.000 | 0.000 | 1a   | 1    |
| 31 O  | O31  | 0.03088 | 0.75107 | 0.06679  | 1.000 | 0.000 | 1a   | 1    |
| 32 O  | O32  | 0.27248 | 0.64588 | 0.05811  | 1.000 | 0.000 | 1a   | 1    |
| 33 Zn | Zn33 | 0.10724 | 0.85840 | 0.07111  | 1.000 | 0.000 | 1a   | 1    |
| 34 Zn | Zn34 | 0.35964 | 0.93968 | 0.10326  | 1.000 | 0.000 | 1a   | 1    |
| 35 O  | O35  | 0.10090 | 0.86486 | -0.00818 | 1.000 | 0.000 | 1a   | 1    |
| 36 O  | O36  | 0.34803 | 0.96529 | -0.03560 | 1.000 | 0.000 | 1a   | 1    |
| 37 Zn | Zn37 | 0.01512 | 0.96119 | -0.02810 | 1.000 | 0.000 | 1a   | 1    |
| 38 Zn | Zn38 | 0.27855 | 0.86146 | -0.01522 | 1.000 | 0.000 | 1a   | 1    |
| 39 O  | O39  | 0.03745 | 0.94623 | 0.11471  | 1.000 | 0.000 | 1a   | 1    |
| 40 O  | O40  | 0.28215 | 0.85692 | 0.06449  | 1.000 | 0.000 | 1a   | 1    |
| 41 Zn | Zn41 | 0.61778 | 0.05475 | 0.11414  | 1.000 | 0.000 | 1a   | 1    |
| 42 Zn | Zn42 | 0.84697 | 0.14676 | 0.08952  | 1.000 | 0.000 | 1a   | 1    |
| 43 O  | O43  | 0.60343 | 0.06341 | -0.02377 | 1.000 | 0.000 | 1a   | 1    |



|        |       |          |         |          |       |       |    |   |
|--------|-------|----------|---------|----------|-------|-------|----|---|
| 44 O   | O44   | 0.84692  | 0.16004 | 0.01263  | 1.000 | 0.000 | 1a | 1 |
| 45 Zn  | Zn45  | 0.51345  | 0.15129 | -0.00195 | 1.000 | 0.000 | 1a | 1 |
| 46 Zn  | Zn46  | 0.76421  | 0.04867 | 0.00195  | 1.000 | 0.000 | 1a | 1 |
| 47 O   | O47   | 0.49965  | 0.14852 | 0.11936  | 1.000 | 0.000 | 1a | 1 |
| 48 O   | O48   | 0.76848  | 0.04080 | 0.07850  | 1.000 | 0.000 | 1a | 1 |
| 49 Zn  | Zn49  | 0.58006  | 0.25803 | 0.10814  | 1.000 | 0.000 | 1a | 1 |
| 50 Zn  | Zn50  | 0.83377  | 0.36507 | 0.10477  | 1.000 | 0.000 | 1a | 1 |
| 51 O   | O51   | 0.58426  | 0.25090 | 0.02627  | 1.000 | 0.000 | 1a | 1 |
| 52 O   | O52   | 0.83634  | 0.36285 | 0.01947  | 1.000 | 0.000 | 1a | 1 |
| 53 Zn  | Zn53  | 0.50453  | 0.35271 | 0.00881  | 1.000 | 0.000 | 1a | 1 |
| 54 Zn  | Zn54  | 0.75401  | 0.25922 | 0.01730  | 1.000 | 0.000 | 1a | 1 |
| 55 O   | O55   | 0.51161  | 0.37359 | 0.10570  | 1.000 | 0.000 | 1a | 1 |
| 56 O   | O56   | 0.76430  | 0.25027 | 0.11227  | 1.000 | 0.000 | 1a | 1 |
| 57 Zn  | Zn57  | 0.60036  | 0.46711 | 0.07169  | 1.000 | 0.000 | 1a | 1 |
| 58 Zn  | Zn58  | 0.86488  | 0.56350 | 0.09503  | 1.000 | 0.000 | 1a | 1 |
| 59 O   | O59   | 0.60067  | 0.44713 | -0.00495 | 1.000 | 0.000 | 1a | 1 |
| 60 O   | O60   | 0.85584  | 0.54615 | -0.04182 | 1.000 | 0.000 | 1a | 1 |
| 61 Zn  | Zn61  | 0.51695  | 0.56228 | -0.01616 | 1.000 | 0.000 | 1a | 1 |
| 62 Zn  | Zn62  | 0.76988  | 0.45904 | -0.01638 | 1.000 | 0.000 | 1a | 1 |
| 63 O   | O63   | 0.51718  | 0.56800 | 0.05926  | 1.000 | 0.000 | 1a | 1 |
| 64 O   | O64   | 0.74844  | 0.46992 | 0.10721  | 1.000 | 0.000 | 1a | 1 |
| 65 Zn  | Zn65  | 0.61935  | 0.65530 | 0.09226  | 1.000 | 0.000 | 1a | 1 |
| 66 Zn  | Zn66  | 0.85842  | 0.74857 | 0.06014  | 1.000 | 0.000 | 1a | 1 |
| 67 O   | O67   | 0.60618  | 0.65475 | -0.04074 | 1.000 | 0.000 | 1a | 1 |
| 68 O   | O68   | 0.85773  | 0.75522 | -0.01982 | 1.000 | 0.000 | 1a | 1 |
| 69 Zn  | Zn69  | 0.53453  | 0.75209 | -0.01479 | 1.000 | 0.000 | 1a | 1 |
| 70 Zn  | Zn70  | 0.77256  | 0.64876 | -0.02315 | 1.000 | 0.000 | 1a | 1 |
| 71 O   | O71   | 0.52946  | 0.75181 | 0.07055  | 1.000 | 0.000 | 1a | 1 |
| 72 O   | O72   | 0.77286  | 0.64526 | 0.05884  | 1.000 | 0.000 | 1a | 1 |
| 73 Zn  | Zn73  | 0.60869  | 0.85813 | 0.07248  | 1.000 | 0.000 | 1a | 1 |
| 74 Zn  | Zn74  | 0.85776  | 0.94160 | 0.10292  | 1.000 | 0.000 | 1a | 1 |
| 75 O   | O75   | 0.60067  | 0.86479 | -0.00658 | 1.000 | 0.000 | 1a | 1 |
| 76 O   | O76   | 0.84731  | 0.96578 | -0.03489 | 1.000 | 0.000 | 1a | 1 |
| 77 Zn  | Zn77  | 0.51542  | 0.96105 | -0.02735 | 1.000 | 0.000 | 1a | 1 |
| 78 Zn  | Zn78  | 0.77852  | 0.86161 | -0.01464 | 1.000 | 0.000 | 1a | 1 |
| 79 O   | O79   | 0.53759  | 0.94589 | 0.11569  | 1.000 | 0.000 | 1a | 1 |
| 80 O   | O80   | 0.78318  | 0.85649 | 0.06485  | 1.000 | 0.000 | 1a | 1 |
| 81 In  | In81  | 0.01389  | 0.14362 | 0.20225  | 1.000 | 0.000 | 1a | 1 |
| 82 In  | In82  | 0.26303  | 0.25691 | 0.19480  | 1.000 | 0.000 | 1a | 1 |
| 83 In  | In83  | 0.27256  | 0.00198 | 0.22102  | 1.000 | 0.000 | 1a | 1 |
| 84 In  | In84  | 0.00875  | 0.39956 | 0.18995  | 1.000 | 0.000 | 1a | 1 |
| 85 O   | O85   | 0.18763  | 0.09637 | 0.18219  | 1.000 | 0.000 | 1a | 1 |
| 86 O   | O86   | -0.03007 | 0.02109 | 0.22649  | 1.000 | 0.000 | 1a | 1 |
| 87 O   | O87   | 0.11488  | 0.47076 | 0.23128  | 1.000 | 0.000 | 1a | 1 |
| 88 O   | O88   | 0.32359  | 0.37970 | 0.18437  | 1.000 | 0.000 | 1a | 1 |
| 89 O   | O89   | 0.36601  | 0.19532 | 0.24246  | 1.000 | 0.000 | 1a | 1 |
| 90 O   | O90   | 0.07708  | 0.27016 | 0.19356  | 1.000 | 0.000 | 1a | 1 |
| 91 In  | In91  | 0.50340  | 0.14653 | 0.20210  | 1.000 | 0.000 | 1a | 1 |
| 92 In  | In92  | 0.76031  | 0.25435 | 0.19554  | 1.000 | 0.000 | 1a | 1 |
| 93 In  | In93  | 0.78388  | 0.01891 | 0.22274  | 1.000 | 0.000 | 1a | 1 |
| 94 In  | In94  | 0.50476  | 0.40333 | 0.18513  | 1.000 | 0.000 | 1a | 1 |
| 95 O   | O95   | 0.67081  | 0.09349 | 0.18131  | 1.000 | 0.000 | 1a | 1 |
| 96 O   | O96   | 0.45297  | 0.02487 | 0.22712  | 1.000 | 0.000 | 1a | 1 |
| 97 O   | O97   | 0.61183  | 0.46620 | 0.23118  | 1.000 | 0.000 | 1a | 1 |
| 98 O   | O98   | 0.82789  | 0.37529 | 0.18752  | 1.000 | 0.000 | 1a | 1 |
| 99 O   | O99   | 0.85031  | 0.16777 | 0.23485  | 1.000 | 0.000 | 1a | 1 |
| 100 O  | O100  | 0.57649  | 0.27316 | 0.18850  | 1.000 | 0.000 | 1a | 1 |
| 101 In | In101 | -0.01033 | 0.66471 | 0.19279  | 1.000 | 0.000 | 1a | 1 |
| 102 In | In102 | 0.24727  | 0.79583 | 0.20764  | 1.000 | 0.000 | 1a | 1 |
| 103 In | In103 | 0.23874  | 0.51435 | 0.18287  | 1.000 | 0.000 | 1a | 1 |
| 104 In | In104 | 0.01985  | 0.90737 | 0.19265  | 1.000 | 0.000 | 1a | 1 |
| 105 O  | O105  | 0.15038  | 0.62709 | 0.16103  | 1.000 | 0.000 | 1a | 1 |

|        |       |          |          |         |       |       |    |   |
|--------|-------|----------|----------|---------|-------|-------|----|---|
| 106 O  | O106  | -0.08910 | 0.55097  | 0.16806 | 1.000 | 0.000 | 1a | 1 |
| 107 O  | O107  | 0.16730  | 0.90399  | 0.24485 | 1.000 | 0.000 | 1a | 1 |
| 108 O  | O108  | 0.33846  | 0.89907  | 0.17327 | 1.000 | 0.000 | 1a | 1 |
| 109 O  | O109  | 0.35065  | 0.70406  | 0.23407 | 1.000 | 0.000 | 1a | 1 |
| 110 O  | O110  | 0.07445  | 0.78500  | 0.17933 | 1.000 | 0.000 | 1a | 1 |
| 111 In | In111 | 0.49295  | 0.66499  | 0.19334 | 1.000 | 0.000 | 1a | 1 |
| 112 In | In112 | 0.74985  | 0.80614  | 0.21318 | 1.000 | 0.000 | 1a | 1 |
| 113 In | In113 | 0.73745  | 0.51314  | 0.18506 | 1.000 | 0.000 | 1a | 1 |
| 114 In | In114 | 0.52627  | 0.91523  | 0.19482 | 1.000 | 0.000 | 1a | 1 |
| 115 O  | O115  | 0.65381  | 0.62822  | 0.16272 | 1.000 | 0.000 | 1a | 1 |
| 116 O  | O116  | 0.41460  | 0.55012  | 0.16623 | 1.000 | 0.000 | 1a | 1 |
| 117 O  | O117  | 0.67481  | 0.91962  | 0.24654 | 1.000 | 0.000 | 1a | 1 |
| 118 O  | O118  | 0.83426  | 0.90567  | 0.17311 | 1.000 | 0.000 | 1a | 1 |
| 119 O  | O119  | 0.85907  | 0.71466  | 0.23639 | 1.000 | 0.000 | 1a | 1 |
| 120 O  | O120  | 0.57501  | 0.78887  | 0.18892 | 1.000 | 0.000 | 1a | 1 |
| 121 S  | S121  | 0.55536  | -0.67705 | 0.30922 | 1.000 | 0.000 | 1a | 1 |
| 122 F  | F122  | 0.69616  | -0.70587 | 0.29116 | 1.000 | 0.000 | 1a | 1 |
| 123 F  | F123  | 0.60714  | -0.59967 | 0.34285 | 1.000 | 0.000 | 1a | 1 |
| 124 O  | O124  | 0.51667  | -0.74144 | 0.34299 | 1.000 | 0.000 | 1a | 1 |

# SO<sub>2</sub>F<sub>2</sub>/In<sub>2</sub>O<sub>3</sub>-ZnO

Title SO<sub>2</sub>F<sub>2</sub>/In<sub>2</sub>O<sub>3</sub>-ZnO

Lattice type P  
Space group name P 1  
Space group number 1  
Setting number 1

Lattice parameters

| a        | b        | c        | alpha   | beta    | gamma   |
|----------|----------|----------|---------|---------|---------|
| 11.14410 | 16.13730 | 27.43750 | 90.0000 | 90.0000 | 90.0000 |

Unit-cell volume = 4934.241839 Å<sup>3</sup>

Structure parameters

|       |      | x       | y       | z        | Occ.  | U     | Site | Sym. |
|-------|------|---------|---------|----------|-------|-------|------|------|
| 1 Zn  | Zn1  | 0.12582 | 0.04897 | 0.11279  | 1.000 | 0.000 | 1a   | 1    |
| 2 Zn  | Zn2  | 0.35342 | 0.14103 | 0.08744  | 1.000 | 0.000 | 1a   | 1    |
| 3 O   | O3   | 0.11027 | 0.05829 | -0.02577 | 1.000 | 0.000 | 1a   | 1    |
| 4 O   | O4   | 0.35370 | 0.15454 | 0.01058  | 1.000 | 0.000 | 1a   | 1    |
| 5 Zn  | Zn5  | 0.02036 | 0.14581 | -0.00343 | 1.000 | 0.000 | 1a   | 1    |
| 6 Zn  | Zn6  | 0.27106 | 0.04312 | -0.00007 | 1.000 | 0.000 | 1a   | 1    |
| 7 O   | O7   | 0.00729 | 0.14266 | 0.11850  | 1.000 | 0.000 | 1a   | 1    |
| 8 O   | O8   | 0.27542 | 0.03490 | 0.07655  | 1.000 | 0.000 | 1a   | 1    |
| 9 Zn  | Zn9  | 0.08620 | 0.25224 | 0.10672  | 1.000 | 0.000 | 1a   | 1    |
| 10 Zn | Zn10 | 0.34010 | 0.36027 | 0.10247  | 1.000 | 0.000 | 1a   | 1    |
| 11 O  | O11  | 0.09085 | 0.24547 | 0.02504  | 1.000 | 0.000 | 1a   | 1    |
| 12 O  | O12  | 0.34352 | 0.35708 | 0.01794  | 1.000 | 0.000 | 1a   | 1    |
| 13 Zn | Zn13 | 0.01166 | 0.34731 | 0.00739  | 1.000 | 0.000 | 1a   | 1    |
| 14 Zn | Zn14 | 0.26071 | 0.25366 | 0.01571  | 1.000 | 0.000 | 1a   | 1    |
| 15 O  | O15  | 0.02057 | 0.36796 | 0.10692  | 1.000 | 0.000 | 1a   | 1    |
| 16 O  | O16  | 0.27000 | 0.24469 | 0.11009  | 1.000 | 0.000 | 1a   | 1    |
| 17 Zn | Zn17 | 0.10544 | 0.46120 | 0.07118  | 1.000 | 0.000 | 1a   | 1    |
| 18 Zn | Zn18 | 0.37309 | 0.55854 | 0.09284  | 1.000 | 0.000 | 1a   | 1    |
| 19 O  | O19  | 0.10766 | 0.44181 | -0.00575 | 1.000 | 0.000 | 1a   | 1    |
| 20 O  | O20  | 0.36341 | 0.54065 | -0.04279 | 1.000 | 0.000 | 1a   | 1    |

|    |    |      |         |         |          |       |       |    |   |
|----|----|------|---------|---------|----------|-------|-------|----|---|
| 21 | Zn | Zn21 | 0.02397 | 0.55695 | -0.01693 | 1.000 | 0.000 | 1a | 1 |
| 22 | Zn | Zn22 | 0.27680 | 0.45400 | -0.01714 | 1.000 | 0.000 | 1a | 1 |
| 23 | O  | O23  | 0.02286 | 0.56224 | 0.05849  | 1.000 | 0.000 | 1a | 1 |
| 24 | O  | O24  | 0.25588 | 0.46567 | 0.10476  | 1.000 | 0.000 | 1a | 1 |
| 25 | Zn | Zn25 | 0.12609 | 0.64992 | 0.09062  | 1.000 | 0.000 | 1a | 1 |
| 26 | Zn | Zn26 | 0.36541 | 0.74344 | 0.05884  | 1.000 | 0.000 | 1a | 1 |
| 27 | O  | O27  | 0.11330 | 0.64900 | -0.04204 | 1.000 | 0.000 | 1a | 1 |
| 28 | O  | O28  | 0.36522 | 0.74984 | -0.02117 | 1.000 | 0.000 | 1a | 1 |
| 29 | Zn | Zn29 | 0.04160 | 0.74645 | -0.01605 | 1.000 | 0.000 | 1a | 1 |
| 30 | Zn | Zn30 | 0.27977 | 0.64342 | -0.02447 | 1.000 | 0.000 | 1a | 1 |
| 31 | O  | O31  | 0.03722 | 0.74630 | 0.06786  | 1.000 | 0.000 | 1a | 1 |
| 32 | O  | O32  | 0.27978 | 0.64020 | 0.05720  | 1.000 | 0.000 | 1a | 1 |
| 33 | Zn | Zn33 | 0.11513 | 0.85310 | 0.07056  | 1.000 | 0.000 | 1a | 1 |
| 34 | Zn | Zn34 | 0.36495 | 0.93584 | 0.10144  | 1.000 | 0.000 | 1a | 1 |
| 35 | O  | O35  | 0.10786 | 0.85957 | -0.00856 | 1.000 | 0.000 | 1a | 1 |
| 36 | O  | O36  | 0.35467 | 0.96016 | -0.03663 | 1.000 | 0.000 | 1a | 1 |
| 37 | Zn | Zn37 | 0.02229 | 0.95576 | -0.02906 | 1.000 | 0.000 | 1a | 1 |
| 38 | Zn | Zn38 | 0.28565 | 0.85614 | -0.01627 | 1.000 | 0.000 | 1a | 1 |
| 39 | O  | O39  | 0.04416 | 0.94070 | 0.11390  | 1.000 | 0.000 | 1a | 1 |
| 40 | O  | O40  | 0.28974 | 0.85115 | 0.06335  | 1.000 | 0.000 | 1a | 1 |
| 41 | Zn | Zn41 | 0.62786 | 0.04809 | 0.11328  | 1.000 | 0.000 | 1a | 1 |
| 42 | Zn | Zn42 | 0.85113 | 0.14190 | 0.08742  | 1.000 | 0.000 | 1a | 1 |
| 43 | O  | O43  | 0.61078 | 0.05816 | -0.02612 | 1.000 | 0.000 | 1a | 1 |
| 44 | O  | O44  | 0.85284 | 0.15459 | 0.01057  | 1.000 | 0.000 | 1a | 1 |
| 45 | Zn | Zn45 | 0.52079 | 0.14552 | -0.00372 | 1.000 | 0.000 | 1a | 1 |
| 46 | Zn | Zn46 | 0.77121 | 0.04278 | -0.00004 | 1.000 | 0.000 | 1a | 1 |
| 47 | O  | O47  | 0.50968 | 0.14206 | 0.11884  | 1.000 | 0.000 | 1a | 1 |
| 48 | O  | O48  | 0.77652 | 0.03440 | 0.07660  | 1.000 | 0.000 | 1a | 1 |
| 49 | Zn | Zn49 | 0.58690 | 0.25209 | 0.10661  | 1.000 | 0.000 | 1a | 1 |
| 50 | Zn | Zn50 | 0.83978 | 0.36069 | 0.10233  | 1.000 | 0.000 | 1a | 1 |
| 51 | O  | O51  | 0.59114 | 0.24522 | 0.02501  | 1.000 | 0.000 | 1a | 1 |
| 52 | O  | O52  | 0.84332 | 0.35716 | 0.01775  | 1.000 | 0.000 | 1a | 1 |
| 53 | Zn | Zn53 | 0.51157 | 0.34687 | 0.00724  | 1.000 | 0.000 | 1a | 1 |
| 54 | Zn | Zn54 | 0.76051 | 0.25401 | 0.01471  | 1.000 | 0.000 | 1a | 1 |
| 55 | O  | O55  | 0.52125 | 0.36749 | 0.10725  | 1.000 | 0.000 | 1a | 1 |
| 56 | O  | O56  | 0.76974 | 0.24578 | 0.11114  | 1.000 | 0.000 | 1a | 1 |
| 57 | Zn | Zn57 | 0.60536 | 0.46064 | 0.07114  | 1.000 | 0.000 | 1a | 1 |
| 58 | Zn | Zn58 | 0.87351 | 0.55890 | 0.09341  | 1.000 | 0.000 | 1a | 1 |
| 59 | O  | O59  | 0.60759 | 0.44136 | -0.00586 | 1.000 | 0.000 | 1a | 1 |
| 60 | O  | O60  | 0.86356 | 0.54081 | -0.04263 | 1.000 | 0.000 | 1a | 1 |
| 61 | Zn | Zn61 | 0.52401 | 0.55665 | -0.01721 | 1.000 | 0.000 | 1a | 1 |
| 62 | Zn | Zn62 | 0.77658 | 0.45419 | -0.01723 | 1.000 | 0.000 | 1a | 1 |
| 63 | O  | O63  | 0.52269 | 0.56158 | 0.05817  | 1.000 | 0.000 | 1a | 1 |
| 64 | O  | O64  | 0.75600 | 0.46598 | 0.10470  | 1.000 | 0.000 | 1a | 1 |
| 65 | Zn | Zn65 | 0.62560 | 0.64951 | 0.09027  | 1.000 | 0.000 | 1a | 1 |
| 66 | Zn | Zn66 | 0.86515 | 0.74362 | 0.05924  | 1.000 | 0.000 | 1a | 1 |
| 67 | O  | O67  | 0.61357 | 0.64853 | -0.04236 | 1.000 | 0.000 | 1a | 1 |
| 68 | O  | O68  | 0.86547 | 0.74979 | -0.02073 | 1.000 | 0.000 | 1a | 1 |
| 69 | Zn | Zn69 | 0.54159 | 0.74613 | -0.01652 | 1.000 | 0.000 | 1a | 1 |
| 70 | Zn | Zn70 | 0.77970 | 0.64344 | -0.02416 | 1.000 | 0.000 | 1a | 1 |
| 71 | O  | O71  | 0.53773 | 0.74567 | 0.06632  | 1.000 | 0.000 | 1a | 1 |
| 72 | O  | O72  | 0.78012 | 0.64020 | 0.05743  | 1.000 | 0.000 | 1a | 1 |
| 73 | Zn | Zn73 | 0.61448 | 0.85288 | 0.07003  | 1.000 | 0.000 | 1a | 1 |
| 74 | Zn | Zn74 | 0.86559 | 0.93501 | 0.10178  | 1.000 | 0.000 | 1a | 1 |
| 75 | O  | O75  | 0.60786 | 0.85939 | -0.00918 | 1.000 | 0.000 | 1a | 1 |
| 76 | O  | O76  | 0.85475 | 0.96000 | -0.03679 | 1.000 | 0.000 | 1a | 1 |
| 77 | Zn | Zn77 | 0.52239 | 0.95574 | -0.02939 | 1.000 | 0.000 | 1a | 1 |
| 78 | Zn | Zn78 | 0.78564 | 0.85604 | -0.01631 | 1.000 | 0.000 | 1a | 1 |
| 79 | O  | O79  | 0.54412 | 0.94070 | 0.11335  | 1.000 | 0.000 | 1a | 1 |
| 80 | O  | O80  | 0.78931 | 0.85135 | 0.06326  | 1.000 | 0.000 | 1a | 1 |
| 81 | In | In81 | 0.01236 | 0.13960 | 0.20113  | 1.000 | 0.000 | 1a | 1 |
| 82 | In | In82 | 0.26909 | 0.24793 | 0.19262  | 1.000 | 0.000 | 1a | 1 |

|        |       |          |         |         |       |       |    |   |
|--------|-------|----------|---------|---------|-------|-------|----|---|
| 83 In  | In83  | 0.28844  | 0.00933 | 0.22089 | 1.000 | 0.000 | 1a | 1 |
| 84 In  | In84  | 0.01484  | 0.39450 | 0.18753 | 1.000 | 0.000 | 1a | 1 |
| 85 O   | O85   | 0.18181  | 0.08868 | 0.17977 | 1.000 | 0.000 | 1a | 1 |
| 86 O   | O86   | -0.03488 | 0.01768 | 0.22631 | 1.000 | 0.000 | 1a | 1 |
| 87 O   | O87   | 0.12316  | 0.46182 | 0.23046 | 1.000 | 0.000 | 1a | 1 |
| 88 O   | O88   | 0.33315  | 0.36974 | 0.18351 | 1.000 | 0.000 | 1a | 1 |
| 89 O   | O89   | 0.35828  | 0.16725 | 0.23579 | 1.000 | 0.000 | 1a | 1 |
| 90 O   | O90   | 0.08430  | 0.26545 | 0.18972 | 1.000 | 0.000 | 1a | 1 |
| 91 In  | In91  | 0.51797  | 0.13848 | 0.20133 | 1.000 | 0.000 | 1a | 1 |
| 92 In  | In92  | 0.76930  | 0.25075 | 0.19374 | 1.000 | 0.000 | 1a | 1 |
| 93 In  | In93  | 0.78292  | 0.00089 | 0.22028 | 1.000 | 0.000 | 1a | 1 |
| 94 In  | In94  | 0.51404  | 0.39396 | 0.18788 | 1.000 | 0.000 | 1a | 1 |
| 95 O   | O95   | 0.68916  | 0.08906 | 0.18022 | 1.000 | 0.000 | 1a | 1 |
| 96 O   | O96   | 0.47303  | 0.01631 | 0.22605 | 1.000 | 0.000 | 1a | 1 |
| 97 O   | O97   | 0.62078  | 0.46335 | 0.23025 | 1.000 | 0.000 | 1a | 1 |
| 98 O   | O98   | 0.83322  | 0.37271 | 0.18482 | 1.000 | 0.000 | 1a | 1 |
| 99 O   | O99   | 0.86367  | 0.17819 | 0.23909 | 1.000 | 0.000 | 1a | 1 |
| 100 O  | O100  | 0.58353  | 0.26480 | 0.19120 | 1.000 | 0.000 | 1a | 1 |
| 101 In | In101 | -0.00103 | 0.65961 | 0.19224 | 1.000 | 0.000 | 1a | 1 |
| 102 In | In102 | 0.25637  | 0.79878 | 0.21013 | 1.000 | 0.000 | 1a | 1 |
| 103 In | In103 | 0.24512  | 0.50879 | 0.18261 | 1.000 | 0.000 | 1a | 1 |
| 104 In | In104 | 0.03180  | 0.90765 | 0.19266 | 1.000 | 0.000 | 1a | 1 |
| 105 O  | O105  | 0.15970  | 0.62295 | 0.16102 | 1.000 | 0.000 | 1a | 1 |
| 106 O  | O106  | -0.07988 | 0.54553 | 0.16629 | 1.000 | 0.000 | 1a | 1 |
| 107 O  | O107  | 0.18010  | 0.91050 | 0.24463 | 1.000 | 0.000 | 1a | 1 |
| 108 O  | O108  | 0.34259  | 0.89959 | 0.17167 | 1.000 | 0.000 | 1a | 1 |
| 109 O  | O109  | 0.36466  | 0.70814 | 0.23458 | 1.000 | 0.000 | 1a | 1 |
| 110 O  | O110  | 0.08228  | 0.78250 | 0.18471 | 1.000 | 0.000 | 1a | 1 |
| 111 In | In111 | 0.49703  | 0.65941 | 0.19161 | 1.000 | 0.000 | 1a | 1 |
| 112 In | In112 | 0.75491  | 0.79313 | 0.20779 | 1.000 | 0.000 | 1a | 1 |
| 113 In | In113 | 0.74501  | 0.50860 | 0.18268 | 1.000 | 0.000 | 1a | 1 |
| 114 In | In114 | 0.52915  | 0.90421 | 0.19166 | 1.000 | 0.000 | 1a | 1 |
| 115 O  | O115  | 0.65857  | 0.62224 | 0.16070 | 1.000 | 0.000 | 1a | 1 |
| 116 O  | O116  | 0.41917  | 0.54588 | 0.16562 | 1.000 | 0.000 | 1a | 1 |
| 117 O  | O117  | 0.67635  | 0.90270 | 0.24402 | 1.000 | 0.000 | 1a | 1 |
| 118 O  | O118  | 0.84427  | 0.89567 | 0.17185 | 1.000 | 0.000 | 1a | 1 |
| 119 O  | O119  | 0.86090  | 0.70275 | 0.23422 | 1.000 | 0.000 | 1a | 1 |
| 120 O  | O120  | 0.58199  | 0.78072 | 0.18015 | 1.000 | 0.000 | 1a | 1 |
| 121 S  | S121  | -0.63637 | 0.44935 | 0.31209 | 1.000 | 0.000 | 1a | 1 |
| 122 O  | O122  | -0.64317 | 0.52535 | 0.28441 | 1.000 | 0.000 | 1a | 1 |
| 123 O  | O123  | -0.60452 | 0.36847 | 0.29366 | 1.000 | 0.000 | 1a | 1 |
| 124 F  | F124  | -0.75790 | 0.43987 | 0.34263 | 1.000 | 0.000 | 1a | 1 |
| 125 F  | F125  | -0.55393 | 0.46751 | 0.35884 | 1.000 | 0.000 | 1a | 1 |

# TiO<sub>2</sub>-ZnO

Title TiO<sub>2</sub>-ZnO

Lattice type P  
Space group name P 1  
Space group number 1  
Setting number 1

Lattice parameters

| a        | b        | c        | alpha   | beta    | gamma   |
|----------|----------|----------|---------|---------|---------|
| 19.18780 | 10.31040 | 29.67230 | 90.0000 | 90.0000 | 90.0000 |

Unit-cell volume = 5870.186532 Å<sup>3</sup>

## Structure parameters

|       |      | x       | y       | z        | Occ.  | U     | Site | Sym. |
|-------|------|---------|---------|----------|-------|-------|------|------|
| 1 Zn  | Zn1  | 0.02740 | 0.02562 | 0.01867  | 1.000 | 0.000 | 1a   | 1    |
| 2 Zn  | Zn2  | 0.10766 | 1.00724 | 0.11185  | 1.000 | 0.000 | 1a   | 1    |
| 3 O   | O3   | 0.02550 | 0.19186 | -0.00692 | 1.000 | 0.000 | 1a   | 1    |
| 4 O   | O4   | 0.10979 | 0.18732 | 0.08919  | 1.000 | 0.000 | 1a   | 1    |
| 5 Zn  | Zn5  | 0.10968 | 0.25719 | 0.02066  | 1.000 | 0.000 | 1a   | 1    |
| 6 Zn  | Zn6  | 0.03086 | 0.26492 | 0.12271  | 1.000 | 0.000 | 1a   | 1    |
| 7 O   | O7   | 0.10950 | 0.44793 | 0.02814  | 1.000 | 0.000 | 1a   | 1    |
| 8 O   | O8   | 0.03493 | 0.44937 | 0.13253  | 1.000 | 0.000 | 1a   | 1    |
| 9 Zn  | Zn9  | 0.19335 | 0.02590 | 0.01931  | 1.000 | 0.000 | 1a   | 1    |
| 10 Zn | Zn10 | 0.28159 | 1.00828 | 0.11097  | 1.000 | 0.000 | 1a   | 1    |
| 11 O  | O11  | 0.19347 | 0.19088 | -0.00738 | 1.000 | 0.000 | 1a   | 1    |
| 12 O  | O12  | 0.27678 | 0.18889 | 0.08850  | 1.000 | 0.000 | 1a   | 1    |
| 13 Zn | Zn13 | 0.27683 | 0.25839 | 0.02079  | 1.000 | 0.000 | 1a   | 1    |
| 14 Zn | Zn14 | 0.19329 | 0.26472 | 0.11510  | 1.000 | 0.000 | 1a   | 1    |
| 15 O  | O15  | 0.27778 | 0.44825 | 0.03103  | 1.000 | 0.000 | 1a   | 1    |
| 16 O  | O16  | 0.19185 | 0.44525 | 0.12490  | 1.000 | 0.000 | 1a   | 1    |
| 17 Zn | Zn17 | 0.35839 | 0.02656 | 0.01551  | 1.000 | 0.000 | 1a   | 1    |
| 18 Zn | Zn18 | 0.44921 | 1.01077 | 0.10576  | 1.000 | 0.000 | 1a   | 1    |
| 19 O  | O19  | 0.36109 | 0.19566 | -0.00775 | 1.000 | 0.000 | 1a   | 1    |
| 20 O  | O20  | 0.43960 | 0.19851 | 0.09233  | 1.000 | 0.000 | 1a   | 1    |
| 21 Zn | Zn21 | 0.44117 | 0.26023 | 0.02518  | 1.000 | 0.000 | 1a   | 1    |
| 22 Zn | Zn22 | 0.35624 | 0.26464 | 0.12186  | 1.000 | 0.000 | 1a   | 1    |
| 23 O  | O23  | 0.44172 | 0.44674 | 0.04173  | 1.000 | 0.000 | 1a   | 1    |
| 24 O  | O24  | 0.34897 | 0.44854 | 0.13814  | 1.000 | 0.000 | 1a   | 1    |
| 25 Zn | Zn25 | 0.52343 | 0.02967 | 0.00851  | 1.000 | 0.000 | 1a   | 1    |
| 26 Zn | Zn26 | 0.61051 | 1.01018 | 0.09533  | 1.000 | 0.000 | 1a   | 1    |
| 27 O  | O27  | 0.52474 | 0.20622 | -0.00688 | 1.000 | 0.000 | 1a   | 1    |
| 28 O  | O28  | 0.60845 | 0.20223 | 0.09039  | 1.000 | 0.000 | 1a   | 1    |
| 29 Zn | Zn29 | 0.60933 | 0.26133 | 0.02264  | 1.000 | 0.000 | 1a   | 1    |
| 30 Zn | Zn30 | 0.52547 | 0.26506 | 0.12030  | 1.000 | 0.000 | 1a   | 1    |
| 31 O  | O31  | 0.60996 | 0.44392 | 0.04378  | 1.000 | 0.000 | 1a   | 1    |
| 32 O  | O32  | 0.52002 | 0.44890 | 0.14324  | 1.000 | 0.000 | 1a   | 1    |
| 33 Zn | Zn33 | 0.69445 | 0.02844 | 0.00618  | 1.000 | 0.000 | 1a   | 1    |
| 34 Zn | Zn34 | 0.77498 | 1.01136 | 0.09829  | 1.000 | 0.000 | 1a   | 1    |
| 35 O  | O35  | 0.69425 | 0.20676 | -0.00695 | 1.000 | 0.000 | 1a   | 1    |
| 36 O  | O36  | 0.78073 | 0.20192 | 0.09126  | 1.000 | 0.000 | 1a   | 1    |
| 37 Zn | Zn37 | 0.77883 | 0.26085 | 0.02333  | 1.000 | 0.000 | 1a   | 1    |
| 38 Zn | Zn38 | 0.69399 | 0.26582 | 0.11734  | 1.000 | 0.000 | 1a   | 1    |
| 39 O  | O39  | 0.77770 | 0.44461 | 0.04296  | 1.000 | 0.000 | 1a   | 1    |
| 40 O  | O40  | 0.69527 | 0.44945 | 0.14290  | 1.000 | 0.000 | 1a   | 1    |
| 41 Zn | Zn41 | 0.86395 | 0.02922 | 0.01095  | 1.000 | 0.000 | 1a   | 1    |
| 42 Zn | Zn42 | 0.93668 | 1.00978 | 0.10965  | 1.000 | 0.000 | 1a   | 1    |
| 43 O  | O43  | 0.86256 | 0.20363 | -0.00673 | 1.000 | 0.000 | 1a   | 1    |
| 44 O  | O44  | 0.94763 | 0.19464 | 0.09254  | 1.000 | 0.000 | 1a   | 1    |
| 45 Zn | Zn45 | 0.94573 | 0.25968 | 0.02555  | 1.000 | 0.000 | 1a   | 1    |
| 46 Zn | Zn46 | 0.86341 | 0.26580 | 0.12151  | 1.000 | 0.000 | 1a   | 1    |
| 47 O  | O47  | 0.94420 | 0.44824 | 0.03809  | 1.000 | 0.000 | 1a   | 1    |
| 48 O  | O48  | 0.86914 | 0.44939 | 0.14204  | 1.000 | 0.000 | 1a   | 1    |
| 49 Zn | Zn49 | 0.02343 | 0.52967 | 0.00851  | 1.000 | 0.000 | 1a   | 1    |
| 50 Zn | Zn50 | 0.11051 | 0.51018 | 0.09533  | 1.000 | 0.000 | 1a   | 1    |
| 51 O  | O51  | 0.02474 | 0.70622 | -0.00688 | 1.000 | 0.000 | 1a   | 1    |
| 52 O  | O52  | 0.10845 | 0.70223 | 0.09039  | 1.000 | 0.000 | 1a   | 1    |
| 53 Zn | Zn53 | 0.10933 | 0.76133 | 0.02264  | 1.000 | 0.000 | 1a   | 1    |
| 54 Zn | Zn54 | 0.02547 | 0.76506 | 0.12030  | 1.000 | 0.000 | 1a   | 1    |
| 55 O  | O55  | 0.10996 | 0.94392 | 0.04378  | 1.000 | 0.000 | 1a   | 1    |
| 56 O  | O56  | 0.02002 | 0.94890 | 0.14324  | 1.000 | 0.000 | 1a   | 1    |
| 57 Zn | Zn57 | 0.19445 | 0.52844 | 0.00618  | 1.000 | 0.000 | 1a   | 1    |
| 58 Zn | Zn58 | 0.27498 | 0.51136 | 0.09829  | 1.000 | 0.000 | 1a   | 1    |

|        |       |         |          |          |       |       |    |   |
|--------|-------|---------|----------|----------|-------|-------|----|---|
| 59 O   | O59   | 0.19425 | 0.70676  | -0.00695 | 1.000 | 0.000 | 1a | 1 |
| 60 O   | O60   | 0.28073 | 0.70192  | 0.09126  | 1.000 | 0.000 | 1a | 1 |
| 61 Zn  | Zn61  | 0.27883 | 0.76085  | 0.02333  | 1.000 | 0.000 | 1a | 1 |
| 62 Zn  | Zn62  | 0.19399 | 0.76582  | 0.11734  | 1.000 | 0.000 | 1a | 1 |
| 63 O   | O63   | 0.27770 | 0.94461  | 0.04296  | 1.000 | 0.000 | 1a | 1 |
| 64 O   | O64   | 0.19527 | 0.94945  | 0.14290  | 1.000 | 0.000 | 1a | 1 |
| 65 Zn  | Zn65  | 0.36395 | 0.52922  | 0.01095  | 1.000 | 0.000 | 1a | 1 |
| 66 Zn  | Zn66  | 0.43668 | 0.50978  | 0.10965  | 1.000 | 0.000 | 1a | 1 |
| 67 O   | O67   | 0.36256 | 0.70363  | -0.00673 | 1.000 | 0.000 | 1a | 1 |
| 68 O   | O68   | 0.44763 | 0.69464  | 0.09254  | 1.000 | 0.000 | 1a | 1 |
| 69 Zn  | Zn69  | 0.44573 | 0.75968  | 0.02555  | 1.000 | 0.000 | 1a | 1 |
| 70 Zn  | Zn70  | 0.36341 | 0.76580  | 0.12151  | 1.000 | 0.000 | 1a | 1 |
| 71 O   | O71   | 0.44420 | 0.94824  | 0.03809  | 1.000 | 0.000 | 1a | 1 |
| 72 O   | O72   | 0.36914 | 0.94939  | 0.14204  | 1.000 | 0.000 | 1a | 1 |
| 73 Zn  | Zn73  | 0.52740 | 0.52562  | 0.01867  | 1.000 | 0.000 | 1a | 1 |
| 74 Zn  | Zn74  | 0.60766 | 0.50724  | 0.11185  | 1.000 | 0.000 | 1a | 1 |
| 75 O   | O75   | 0.52550 | 0.69186  | -0.00692 | 1.000 | 0.000 | 1a | 1 |
| 76 O   | O76   | 0.60979 | 0.68732  | 0.08919  | 1.000 | 0.000 | 1a | 1 |
| 77 Zn  | Zn77  | 0.60968 | 0.75719  | 0.02066  | 1.000 | 0.000 | 1a | 1 |
| 78 Zn  | Zn78  | 0.53086 | 0.76492  | 0.12271  | 1.000 | 0.000 | 1a | 1 |
| 79 O   | O79   | 0.60950 | 0.94793  | 0.02814  | 1.000 | 0.000 | 1a | 1 |
| 80 O   | O80   | 0.53493 | 0.94937  | 0.13253  | 1.000 | 0.000 | 1a | 1 |
| 81 Zn  | Zn81  | 0.69335 | 0.52590  | 0.01931  | 1.000 | 0.000 | 1a | 1 |
| 82 Zn  | Zn82  | 0.78159 | 0.50828  | 0.11097  | 1.000 | 0.000 | 1a | 1 |
| 83 O   | O83   | 0.69347 | 0.69088  | -0.00738 | 1.000 | 0.000 | 1a | 1 |
| 84 O   | O84   | 0.77678 | 0.68889  | 0.08850  | 1.000 | 0.000 | 1a | 1 |
| 85 Zn  | Zn85  | 0.77683 | 0.75839  | 0.02079  | 1.000 | 0.000 | 1a | 1 |
| 86 Zn  | Zn86  | 0.69329 | 0.76472  | 0.11510  | 1.000 | 0.000 | 1a | 1 |
| 87 O   | O87   | 0.77778 | 0.94825  | 0.03103  | 1.000 | 0.000 | 1a | 1 |
| 88 O   | O88   | 0.69185 | 0.94525  | 0.12490  | 1.000 | 0.000 | 1a | 1 |
| 89 Zn  | Zn89  | 0.85839 | 0.52656  | 0.01551  | 1.000 | 0.000 | 1a | 1 |
| 90 Zn  | Zn90  | 0.94921 | 0.51077  | 0.10576  | 1.000 | 0.000 | 1a | 1 |
| 91 O   | O91   | 0.86109 | 0.69566  | -0.00775 | 1.000 | 0.000 | 1a | 1 |
| 92 O   | O92   | 0.93960 | 0.69851  | 0.09233  | 1.000 | 0.000 | 1a | 1 |
| 93 Zn  | Zn93  | 0.94117 | 0.76023  | 0.02518  | 1.000 | 0.000 | 1a | 1 |
| 94 Zn  | Zn94  | 0.85624 | 0.76464  | 0.12186  | 1.000 | 0.000 | 1a | 1 |
| 95 O   | O95   | 0.94172 | 0.94674  | 0.04173  | 1.000 | 0.000 | 1a | 1 |
| 96 O   | O96   | 0.84897 | 0.94854  | 0.13814  | 1.000 | 0.000 | 1a | 1 |
| 97 Ti  | Ti97  | 0.19968 | 0.62981  | 0.23232  | 1.000 | 0.000 | 1a | 1 |
| 98 Ti  | Ti98  | 0.09971 | 0.13502  | 0.23331  | 1.000 | 0.000 | 1a | 1 |
| 99 Ti  | Ti99  | 0.09811 | 0.40234  | 0.21931  | 1.000 | 0.000 | 1a | 1 |
| 100 Ti | Ti100 | 0.19908 | -0.09912 | 0.21512  | 1.000 | 0.000 | 1a | 1 |
| 101 O  | O101  | 0.20003 | 0.43858  | 0.21667  | 1.000 | 0.000 | 1a | 1 |
| 102 O  | O102  | 0.10104 | -0.05642 | 0.21827  | 1.000 | 0.000 | 1a | 1 |
| 103 O  | O103  | 0.09622 | 0.23758  | 0.18342  | 1.000 | 0.000 | 1a | 1 |
| 104 O  | O104  | 0.19876 | 0.72542  | 0.18263  | 1.000 | 0.000 | 1a | 1 |
| 105 O  | O105  | 0.19881 | 0.08964  | 0.23934  | 1.000 | 0.000 | 1a | 1 |
| 106 O  | O106  | 0.09851 | 0.58398  | 0.23880  | 1.000 | 0.000 | 1a | 1 |
| 107 O  | O107  | 0.10023 | 0.29077  | 0.26596  | 1.000 | 0.000 | 1a | 1 |
| 108 O  | O108  | 0.19938 | -0.21483 | 0.26315  | 1.000 | 0.000 | 1a | 1 |
| 109 Ti | Ti109 | 0.40184 | 0.63485  | 0.23393  | 1.000 | 0.000 | 1a | 1 |
| 110 Ti | Ti110 | 0.29742 | 0.13689  | 0.23242  | 1.000 | 0.000 | 1a | 1 |
| 111 Ti | Ti111 | 0.30350 | 0.40470  | 0.21462  | 1.000 | 0.000 | 1a | 1 |
| 112 Ti | Ti112 | 0.39604 | -0.09604 | 0.21632  | 1.000 | 0.000 | 1a | 1 |
| 113 O  | O113  | 0.40394 | 0.44065  | 0.21961  | 1.000 | 0.000 | 1a | 1 |
| 114 O  | O114  | 0.29634 | -0.05743 | 0.21840  | 1.000 | 0.000 | 1a | 1 |
| 115 O  | O115  | 0.29788 | 0.23237  | 0.18127  | 1.000 | 0.000 | 1a | 1 |
| 116 O  | O116  | 0.40616 | 0.73018  | 0.18356  | 1.000 | 0.000 | 1a | 1 |
| 117 O  | O117  | 0.39651 | 0.08669  | 0.23937  | 1.000 | 0.000 | 1a | 1 |
| 118 O  | O118  | 0.30139 | 0.58515  | 0.23637  | 1.000 | 0.000 | 1a | 1 |
| 119 O  | O119  | 0.30173 | 0.29398  | 0.26269  | 1.000 | 0.000 | 1a | 1 |
| 120 O  | O120  | 0.39415 | -0.21042 | 0.26446  | 1.000 | 0.000 | 1a | 1 |

|     |    |       |         |          |         |       |       |    |   |
|-----|----|-------|---------|----------|---------|-------|-------|----|---|
| 121 | Ti | Ti121 | 0.59971 | 0.63502  | 0.23331 | 1.000 | 0.000 | 1a | 1 |
| 122 | Ti | Ti122 | 0.49750 | 0.13205  | 0.23399 | 1.000 | 0.000 | 1a | 1 |
| 123 | Ti | Ti123 | 0.50223 | 0.40180  | 0.21653 | 1.000 | 0.000 | 1a | 1 |
| 124 | Ti | Ti124 | 0.59811 | -0.09766 | 0.21931 | 1.000 | 0.000 | 1a | 1 |
| 125 | O  | O125  | 0.60104 | 0.44358  | 0.21827 | 1.000 | 0.000 | 1a | 1 |
| 126 | O  | O126  | 0.49599 | -0.06074 | 0.22015 | 1.000 | 0.000 | 1a | 1 |
| 127 | O  | O127  | 0.49543 | 0.22733  | 0.18390 | 1.000 | 0.000 | 1a | 1 |
| 128 | O  | O128  | 0.59622 | 0.73758  | 0.18342 | 1.000 | 0.000 | 1a | 1 |
| 129 | O  | O129  | 0.59851 | 0.08398  | 0.23880 | 1.000 | 0.000 | 1a | 1 |
| 130 | O  | O130  | 0.50178 | 0.58670  | 0.24123 | 1.000 | 0.000 | 1a | 1 |
| 131 | O  | O131  | 0.50310 | 0.28721  | 0.26466 | 1.000 | 0.000 | 1a | 1 |
| 132 | O  | O132  | 0.60023 | -0.20923 | 0.26596 | 1.000 | 0.000 | 1a | 1 |
| 133 | Ti | Ti133 | 0.79742 | 0.63689  | 0.23242 | 1.000 | 0.000 | 1a | 1 |
| 134 | Ti | Ti134 | 0.69968 | 0.12981  | 0.23232 | 1.000 | 0.000 | 1a | 1 |
| 135 | Ti | Ti135 | 0.69908 | 0.40088  | 0.21512 | 1.000 | 0.000 | 1a | 1 |
| 136 | Ti | Ti136 | 0.80350 | -0.09530 | 0.21462 | 1.000 | 0.000 | 1a | 1 |
| 137 | O  | O137  | 0.79634 | 0.44257  | 0.21840 | 1.000 | 0.000 | 1a | 1 |
| 138 | O  | O138  | 0.70003 | -0.06142 | 0.21667 | 1.000 | 0.000 | 1a | 1 |
| 139 | O  | O139  | 0.69876 | 0.22542  | 0.18263 | 1.000 | 0.000 | 1a | 1 |
| 140 | O  | O140  | 0.79788 | 0.73237  | 0.18127 | 1.000 | 0.000 | 1a | 1 |
| 141 | O  | O141  | 0.80139 | 0.08515  | 0.23637 | 1.000 | 0.000 | 1a | 1 |
| 142 | O  | O142  | 0.69881 | 0.58964  | 0.23934 | 1.000 | 0.000 | 1a | 1 |
| 143 | O  | O143  | 0.69938 | 0.28517  | 0.26315 | 1.000 | 0.000 | 1a | 1 |
| 144 | O  | O144  | 0.80173 | -0.20602 | 0.26269 | 1.000 | 0.000 | 1a | 1 |
| 145 | Ti | Ti145 | 0.99750 | 0.63205  | 0.23399 | 1.000 | 0.000 | 1a | 1 |
| 146 | Ti | Ti146 | 0.90184 | 0.13485  | 0.23393 | 1.000 | 0.000 | 1a | 1 |
| 147 | Ti | Ti147 | 0.89604 | 0.40396  | 0.21632 | 1.000 | 0.000 | 1a | 1 |
| 148 | Ti | Ti148 | 1.00223 | -0.09820 | 0.21653 | 1.000 | 0.000 | 1a | 1 |
| 149 | O  | O149  | 0.99599 | 0.43926  | 0.22015 | 1.000 | 0.000 | 1a | 1 |
| 150 | O  | O150  | 0.90394 | -0.05935 | 0.21961 | 1.000 | 0.000 | 1a | 1 |
| 151 | O  | O151  | 0.90616 | 0.23018  | 0.18356 | 1.000 | 0.000 | 1a | 1 |
| 152 | O  | O152  | 0.99543 | 0.72733  | 0.18390 | 1.000 | 0.000 | 1a | 1 |
| 153 | O  | O153  | 1.00178 | 0.08670  | 0.24123 | 1.000 | 0.000 | 1a | 1 |
| 154 | O  | O154  | 0.89651 | 0.58669  | 0.23937 | 1.000 | 0.000 | 1a | 1 |
| 155 | O  | O155  | 0.89415 | 0.28958  | 0.26446 | 1.000 | 0.000 | 1a | 1 |
| 156 | O  | O156  | 1.00310 | -0.21279 | 0.26466 | 1.000 | 0.000 | 1a | 1 |

# H<sub>2</sub>S/TiO<sub>2</sub>-ZnO

Title H<sub>2</sub>S/TiO<sub>2</sub>-ZnO

Lattice type P  
Space group name P 1  
Space group number 1  
Setting number 1

Lattice parameters

| a        | b        | c        | alpha   | beta    | gamma   |
|----------|----------|----------|---------|---------|---------|
| 19.18780 | 10.31040 | 29.67230 | 90.0000 | 90.0000 | 90.0000 |

Unit-cell volume = 5870.186532 Å<sup>3</sup>

Structure parameters

|      |     | x       | y       | z        | Occ.  | U     | Site | Sym. |
|------|-----|---------|---------|----------|-------|-------|------|------|
| 1 Zn | Zn1 | 0.02655 | 0.02899 | 0.01814  | 1.000 | 0.000 | 1a   | 1    |
| 2 Zn | Zn2 | 0.10689 | 1.01052 | 0.11138  | 1.000 | 0.000 | 1a   | 1    |
| 3 O  | O3  | 0.02436 | 0.19509 | -0.00761 | 1.000 | 0.000 | 1a   | 1    |

|       |      |         |         |          |       |       |    |   |
|-------|------|---------|---------|----------|-------|-------|----|---|
| 4 O   | O4   | 0.10887 | 0.19015 | 0.08827  | 1.000 | 0.000 | 1a | 1 |
| 5 Zn  | Zn5  | 0.10870 | 0.26051 | 0.01962  | 1.000 | 0.000 | 1a | 1 |
| 6 Zn  | Zn6  | 0.03042 | 0.26820 | 0.12205  | 1.000 | 0.000 | 1a | 1 |
| 7 O   | O7   | 0.10862 | 0.45112 | 0.02747  | 1.000 | 0.000 | 1a | 1 |
| 8 O   | O8   | 0.03472 | 0.45253 | 0.13234  | 1.000 | 0.000 | 1a | 1 |
| 9 Zn  | Zn9  | 0.19236 | 0.02932 | 0.01875  | 1.000 | 0.000 | 1a | 1 |
| 10 Zn | Zn10 | 0.28058 | 1.01136 | 0.11028  | 1.000 | 0.000 | 1a | 1 |
| 11 O  | O11  | 0.19238 | 0.19385 | -0.00838 | 1.000 | 0.000 | 1a | 1 |
| 12 O  | O12  | 0.27561 | 0.19156 | 0.08736  | 1.000 | 0.000 | 1a | 1 |
| 13 Zn | Zn13 | 0.27589 | 0.26152 | 0.01954  | 1.000 | 0.000 | 1a | 1 |
| 14 Zn | Zn14 | 0.19238 | 0.26780 | 0.11395  | 1.000 | 0.000 | 1a | 1 |
| 15 O  | O15  | 0.27689 | 0.45124 | 0.03015  | 1.000 | 0.000 | 1a | 1 |
| 16 O  | O16  | 0.19100 | 0.44812 | 0.12403  | 1.000 | 0.000 | 1a | 1 |
| 17 Zn | Zn17 | 0.35716 | 0.02941 | 0.01421  | 1.000 | 0.000 | 1a | 1 |
| 18 Zn | Zn18 | 0.44686 | 1.01292 | 0.10444  | 1.000 | 0.000 | 1a | 1 |
| 19 O  | O19  | 0.36007 | 0.19874 | -0.00900 | 1.000 | 0.000 | 1a | 1 |
| 20 O  | O20  | 0.43803 | 0.20127 | 0.09120  | 1.000 | 0.000 | 1a | 1 |
| 21 Zn | Zn21 | 0.44008 | 0.26276 | 0.02414  | 1.000 | 0.000 | 1a | 1 |
| 22 Zn | Zn22 | 0.35494 | 0.26741 | 0.12073  | 1.000 | 0.000 | 1a | 1 |
| 23 O  | O23  | 0.44059 | 0.44915 | 0.04132  | 1.000 | 0.000 | 1a | 1 |
| 24 O  | O24  | 0.34739 | 0.45105 | 0.13751  | 1.000 | 0.000 | 1a | 1 |
| 25 Zn | Zn25 | 0.52305 | 0.03192 | 0.00866  | 1.000 | 0.000 | 1a | 1 |
| 26 Zn | Zn26 | 0.60908 | 1.01134 | 0.09678  | 1.000 | 0.000 | 1a | 1 |
| 27 O  | O27  | 0.52432 | 0.20851 | -0.00703 | 1.000 | 0.000 | 1a | 1 |
| 28 O  | O28  | 0.60764 | 0.20379 | 0.09048  | 1.000 | 0.000 | 1a | 1 |
| 29 Zn | Zn29 | 0.60848 | 0.26410 | 0.02289  | 1.000 | 0.000 | 1a | 1 |
| 30 Zn | Zn30 | 0.52393 | 0.26586 | 0.11939  | 1.000 | 0.000 | 1a | 1 |
| 31 O  | O31  | 0.60912 | 0.44656 | 0.04462  | 1.000 | 0.000 | 1a | 1 |
| 32 O  | O32  | 0.51833 | 0.44991 | 0.14284  | 1.000 | 0.000 | 1a | 1 |
| 33 Zn | Zn33 | 0.69327 | 0.03113 | 0.00678  | 1.000 | 0.000 | 1a | 1 |
| 34 Zn | Zn34 | 0.77415 | 1.01412 | 0.09861  | 1.000 | 0.000 | 1a | 1 |
| 35 O  | O35  | 0.69325 | 0.20932 | -0.00685 | 1.000 | 0.000 | 1a | 1 |
| 36 O  | O36  | 0.78016 | 0.20473 | 0.09088  | 1.000 | 0.000 | 1a | 1 |
| 37 Zn | Zn37 | 0.77803 | 0.26370 | 0.02304  | 1.000 | 0.000 | 1a | 1 |
| 38 Zn | Zn38 | 0.69321 | 0.26669 | 0.11705  | 1.000 | 0.000 | 1a | 1 |
| 39 O  | O39  | 0.77713 | 0.44744 | 0.04295  | 1.000 | 0.000 | 1a | 1 |
| 40 O  | O40  | 0.69502 | 0.45062 | 0.14283  | 1.000 | 0.000 | 1a | 1 |
| 41 Zn | Zn41 | 0.86281 | 0.03205 | 0.01096  | 1.000 | 0.000 | 1a | 1 |
| 42 Zn | Zn42 | 0.93624 | 1.01329 | 0.10931  | 1.000 | 0.000 | 1a | 1 |
| 43 O  | O43  | 0.86167 | 0.20630 | -0.00704 | 1.000 | 0.000 | 1a | 1 |
| 44 O  | O44  | 0.94705 | 0.19823 | 0.09220  | 1.000 | 0.000 | 1a | 1 |
| 45 Zn | Zn45 | 0.94480 | 0.26272 | 0.02517  | 1.000 | 0.000 | 1a | 1 |
| 46 Zn | Zn46 | 0.86265 | 0.26834 | 0.12129  | 1.000 | 0.000 | 1a | 1 |
| 47 O  | O47  | 0.94353 | 0.45130 | 0.03788  | 1.000 | 0.000 | 1a | 1 |
| 48 O  | O48  | 0.86882 | 0.45200 | 0.14189  | 1.000 | 0.000 | 1a | 1 |
| 49 Zn | Zn49 | 0.02245 | 0.53306 | 0.00809  | 1.000 | 0.000 | 1a | 1 |
| 50 Zn | Zn50 | 0.10968 | 0.51374 | 0.09467  | 1.000 | 0.000 | 1a | 1 |
| 51 O  | O51  | 0.02368 | 0.70961 | -0.00720 | 1.000 | 0.000 | 1a | 1 |
| 52 O  | O52  | 0.10766 | 0.70570 | 0.08991  | 1.000 | 0.000 | 1a | 1 |
| 53 Zn | Zn53 | 0.10850 | 0.76472 | 0.02213  | 1.000 | 0.000 | 1a | 1 |
| 54 Zn | Zn54 | 0.02479 | 0.76840 | 0.12002  | 1.000 | 0.000 | 1a | 1 |
| 55 O  | O55  | 0.10906 | 0.94720 | 0.04326  | 1.000 | 0.000 | 1a | 1 |
| 56 O  | O56  | 0.01949 | 0.95209 | 0.14304  | 1.000 | 0.000 | 1a | 1 |
| 57 Zn | Zn57 | 0.19353 | 0.53181 | 0.00551  | 1.000 | 0.000 | 1a | 1 |
| 58 Zn | Zn58 | 0.27393 | 0.51480 | 0.09740  | 1.000 | 0.000 | 1a | 1 |
| 59 O  | O59  | 0.19350 | 0.71018 | -0.00742 | 1.000 | 0.000 | 1a | 1 |
| 60 O  | O60  | 0.28017 | 0.70528 | 0.09081  | 1.000 | 0.000 | 1a | 1 |
| 61 Zn | Zn61 | 0.27822 | 0.76406 | 0.02284  | 1.000 | 0.000 | 1a | 1 |
| 62 Zn | Zn62 | 0.19332 | 0.76921 | 0.11678  | 1.000 | 0.000 | 1a | 1 |
| 63 O  | O63  | 0.27669 | 0.94788 | 0.04218  | 1.000 | 0.000 | 1a | 1 |
| 64 O  | O64  | 0.19440 | 0.95262 | 0.14249  | 1.000 | 0.000 | 1a | 1 |
| 65 Zn | Zn65 | 0.36321 | 0.53237 | 0.01036  | 1.000 | 0.000 | 1a | 1 |



|        |       |         |          |          |       |       |    |   |
|--------|-------|---------|----------|----------|-------|-------|----|---|
| 66 Zn  | Zn66  | 0.43523 | 0.51242  | 0.10910  | 1.000 | 0.000 | 1a | 1 |
| 67 O   | O67   | 0.36243 | 0.70710  | -0.00669 | 1.000 | 0.000 | 1a | 1 |
| 68 O   | O68   | 0.44761 | 0.69744  | 0.09333  | 1.000 | 0.000 | 1a | 1 |
| 69 Zn  | Zn69  | 0.44523 | 0.76205  | 0.02647  | 1.000 | 0.000 | 1a | 1 |
| 70 Zn  | Zn70  | 0.36271 | 0.76871  | 0.12154  | 1.000 | 0.000 | 1a | 1 |
| 71 O   | O71   | 0.44263 | 0.95130  | 0.03705  | 1.000 | 0.000 | 1a | 1 |
| 72 O   | O72   | 0.36753 | 0.95239  | 0.14163  | 1.000 | 0.000 | 1a | 1 |
| 73 Zn  | Zn73  | 0.52673 | 0.52813  | 0.01918  | 1.000 | 0.000 | 1a | 1 |
| 74 Zn  | Zn74  | 0.60670 | 0.50982  | 0.11289  | 1.000 | 0.000 | 1a | 1 |
| 75 O   | O75   | 0.52545 | 0.69504  | -0.00571 | 1.000 | 0.000 | 1a | 1 |
| 76 O   | O76   | 0.60895 | 0.69084  | 0.09197  | 1.000 | 0.000 | 1a | 1 |
| 77 Zn  | Zn77  | 0.60872 | 0.75997  | 0.02318  | 1.000 | 0.000 | 1a | 1 |
| 78 Zn  | Zn78  | 0.52985 | 0.76653  | 0.12638  | 1.000 | 0.000 | 1a | 1 |
| 79 O   | O79   | 0.60872 | 0.95083  | 0.02920  | 1.000 | 0.000 | 1a | 1 |
| 80 O   | O80   | 0.53144 | 0.95251  | 0.13192  | 1.000 | 0.000 | 1a | 1 |
| 81 Zn  | Zn81  | 0.69236 | 0.52841  | 0.01988  | 1.000 | 0.000 | 1a | 1 |
| 82 Zn  | Zn82  | 0.78140 | 0.51062  | 0.11079  | 1.000 | 0.000 | 1a | 1 |
| 83 O   | O83   | 0.69196 | 0.69435  | -0.00589 | 1.000 | 0.000 | 1a | 1 |
| 84 O   | O84   | 0.77581 | 0.69199  | 0.08958  | 1.000 | 0.000 | 1a | 1 |
| 85 Zn  | Zn85  | 0.77576 | 0.76124  | 0.02176  | 1.000 | 0.000 | 1a | 1 |
| 86 Zn  | Zn86  | 0.69294 | 0.76813  | 0.11717  | 1.000 | 0.000 | 1a | 1 |
| 87 O   | O87   | 0.77682 | 0.95125  | 0.03139  | 1.000 | 0.000 | 1a | 1 |
| 88 O   | O88   | 0.69130 | 0.94911  | 0.12618  | 1.000 | 0.000 | 1a | 1 |
| 89 Zn  | Zn89  | 0.85770 | 0.52973  | 0.01544  | 1.000 | 0.000 | 1a | 1 |
| 90 Zn  | Zn90  | 0.94877 | 0.51386  | 0.10561  | 1.000 | 0.000 | 1a | 1 |
| 91 O   | O91   | 0.85973 | 0.69926  | -0.00740 | 1.000 | 0.000 | 1a | 1 |
| 92 O   | O92   | 0.93882 | 0.70152  | 0.09223  | 1.000 | 0.000 | 1a | 1 |
| 93 Zn  | Zn93  | 0.94029 | 0.76355  | 0.02514  | 1.000 | 0.000 | 1a | 1 |
| 94 Zn  | Zn94  | 0.85589 | 0.76856  | 0.12225  | 1.000 | 0.000 | 1a | 1 |
| 95 O   | O95   | 0.94109 | 0.95013  | 0.04141  | 1.000 | 0.000 | 1a | 1 |
| 96 O   | O96   | 0.84901 | 0.95258  | 0.13777  | 1.000 | 0.000 | 1a | 1 |
| 97 Ti  | Ti97  | 0.19894 | 0.63238  | 0.23162  | 1.000 | 0.000 | 1a | 1 |
| 98 Ti  | Ti98  | 0.09918 | 0.13751  | 0.23258  | 1.000 | 0.000 | 1a | 1 |
| 99 Ti  | Ti99  | 0.09757 | 0.40469  | 0.21817  | 1.000 | 0.000 | 1a | 1 |
| 100 Ti | Ti100 | 0.19861 | -0.09639 | 0.21476  | 1.000 | 0.000 | 1a | 1 |
| 101 O  | O101  | 0.19914 | 0.44109  | 0.21548  | 1.000 | 0.000 | 1a | 1 |
| 102 O  | O102  | 0.10035 | -0.05433 | 0.21814  | 1.000 | 0.000 | 1a | 1 |
| 103 O  | O103  | 0.09546 | 0.23941  | 0.18255  | 1.000 | 0.000 | 1a | 1 |
| 104 O  | O104  | 0.19827 | 0.72845  | 0.18206  | 1.000 | 0.000 | 1a | 1 |
| 105 O  | O105  | 0.19824 | 0.09222  | 0.23857  | 1.000 | 0.000 | 1a | 1 |
| 106 O  | O106  | 0.09786 | 0.58636  | 0.23802  | 1.000 | 0.000 | 1a | 1 |
| 107 O  | O107  | 0.09985 | 0.29351  | 0.26500  | 1.000 | 0.000 | 1a | 1 |
| 108 O  | O108  | 0.19869 | -0.21289 | 0.26269  | 1.000 | 0.000 | 1a | 1 |
| 109 Ti | Ti109 | 0.40073 | 0.63701  | 0.23369  | 1.000 | 0.000 | 1a | 1 |
| 110 Ti | Ti110 | 0.29712 | 0.13943  | 0.23154  | 1.000 | 0.000 | 1a | 1 |
| 111 Ti | Ti111 | 0.30256 | 0.40693  | 0.21323  | 1.000 | 0.000 | 1a | 1 |
| 112 Ti | Ti112 | 0.39590 | -0.09358 | 0.21682  | 1.000 | 0.000 | 1a | 1 |
| 113 O  | O113  | 0.40300 | 0.44250  | 0.21819  | 1.000 | 0.000 | 1a | 1 |
| 114 O  | O114  | 0.29592 | -0.05531 | 0.21850  | 1.000 | 0.000 | 1a | 1 |
| 115 O  | O115  | 0.29695 | 0.23415  | 0.18024  | 1.000 | 0.000 | 1a | 1 |
| 116 O  | O116  | 0.40649 | 0.73417  | 0.18365  | 1.000 | 0.000 | 1a | 1 |
| 117 O  | O117  | 0.39611 | 0.09006  | 0.23878  | 1.000 | 0.000 | 1a | 1 |
| 118 O  | O118  | 0.30053 | 0.58706  | 0.23558  | 1.000 | 0.000 | 1a | 1 |
| 119 O  | O119  | 0.30092 | 0.29687  | 0.26155  | 1.000 | 0.000 | 1a | 1 |
| 120 O  | O120  | 0.39280 | -0.20898 | 0.26465  | 1.000 | 0.000 | 1a | 1 |
| 121 Ti | Ti121 | 0.59870 | 0.63260  | 0.23893  | 1.000 | 0.000 | 1a | 1 |
| 122 Ti | Ti122 | 0.49773 | 0.13507  | 0.23329  | 1.000 | 0.000 | 1a | 1 |
| 123 Ti | Ti123 | 0.50107 | 0.40488  | 0.21472  | 1.000 | 0.000 | 1a | 1 |
| 124 Ti | Ti124 | 0.59800 | -0.09986 | 0.22344  | 1.000 | 0.000 | 1a | 1 |
| 125 O  | O125  | 0.60033 | 0.44876  | 0.21655  | 1.000 | 0.000 | 1a | 1 |
| 126 O  | O126  | 0.49581 | -0.05882 | 0.22212  | 1.000 | 0.000 | 1a | 1 |
| 127 O  | O127  | 0.49426 | 0.22887  | 0.18298  | 1.000 | 0.000 | 1a | 1 |

|        |       |         |          |         |       |       |    |   |
|--------|-------|---------|----------|---------|-------|-------|----|---|
| 128 O  | O128  | 0.59324 | 0.74192  | 0.18808 | 1.000 | 0.000 | 1a | 1 |
| 129 O  | O129  | 0.59820 | 0.08800  | 0.23877 | 1.000 | 0.000 | 1a | 1 |
| 130 O  | O130  | 0.49953 | 0.58764  | 0.24125 | 1.000 | 0.000 | 1a | 1 |
| 131 O  | O131  | 0.50392 | 0.29138  | 0.26356 | 1.000 | 0.000 | 1a | 1 |
| 132 O  | O132  | 0.60134 | -0.20615 | 0.27082 | 1.000 | 0.000 | 1a | 1 |
| 133 Ti | Ti133 | 0.79759 | 0.63857  | 0.23248 | 1.000 | 0.000 | 1a | 1 |
| 134 Ti | Ti134 | 0.69853 | 0.13371  | 0.23247 | 1.000 | 0.000 | 1a | 1 |
| 135 Ti | Ti135 | 0.69886 | 0.40502  | 0.21349 | 1.000 | 0.000 | 1a | 1 |
| 136 Ti | Ti136 | 0.80220 | -0.09296 | 0.21671 | 1.000 | 0.000 | 1a | 1 |
| 137 O  | O137  | 0.79602 | 0.44400  | 0.21816 | 1.000 | 0.000 | 1a | 1 |
| 138 O  | O138  | 0.69991 | -0.05920 | 0.21905 | 1.000 | 0.000 | 1a | 1 |
| 139 O  | O139  | 0.70046 | 0.22724  | 0.18237 | 1.000 | 0.000 | 1a | 1 |
| 140 O  | O140  | 0.79794 | 0.73738  | 0.18209 | 1.000 | 0.000 | 1a | 1 |
| 141 O  | O141  | 0.80073 | 0.08821  | 0.23795 | 1.000 | 0.000 | 1a | 1 |
| 142 O  | O142  | 0.69940 | 0.59185  | 0.23855 | 1.000 | 0.000 | 1a | 1 |
| 143 O  | O143  | 0.69595 | 0.29071  | 0.26282 | 1.000 | 0.000 | 1a | 1 |
| 144 O  | O144  | 0.80127 | -0.20636 | 0.26409 | 1.000 | 0.000 | 1a | 1 |
| 145 Ti | Ti145 | 0.99707 | 0.63459  | 0.23356 | 1.000 | 0.000 | 1a | 1 |
| 146 Ti | Ti146 | 0.90106 | 0.13701  | 0.23400 | 1.000 | 0.000 | 1a | 1 |
| 147 Ti | Ti147 | 0.89594 | 0.40562  | 0.21613 | 1.000 | 0.000 | 1a | 1 |
| 148 Ti | Ti148 | 1.00149 | -0.09550 | 0.21639 | 1.000 | 0.000 | 1a | 1 |
| 149 O  | O149  | 0.99545 | 0.44150  | 0.21948 | 1.000 | 0.000 | 1a | 1 |
| 150 O  | O150  | 0.90299 | -0.05693 | 0.22018 | 1.000 | 0.000 | 1a | 1 |
| 151 O  | O151  | 0.90456 | 0.23200  | 0.18351 | 1.000 | 0.000 | 1a | 1 |
| 152 O  | O152  | 0.99418 | 0.73038  | 0.18359 | 1.000 | 0.000 | 1a | 1 |
| 153 O  | O153  | 1.00118 | 0.08932  | 0.24085 | 1.000 | 0.000 | 1a | 1 |
| 154 O  | O154  | 0.89629 | 0.58830  | 0.23953 | 1.000 | 0.000 | 1a | 1 |
| 155 O  | O155  | 0.89438 | 0.29221  | 0.26449 | 1.000 | 0.000 | 1a | 1 |
| 156 O  | O156  | 1.00275 | -0.21075 | 0.26442 | 1.000 | 0.000 | 1a | 1 |
| 157 S  | S157  | 0.60136 | 0.52889  | 0.32540 | 1.000 | 0.000 | 1a | 1 |
| 158 H  | H158  | 0.66572 | 0.57931  | 0.33378 | 1.000 | 0.000 | 1a | 1 |
| 159 H  | H159  | 0.62925 | 0.41355  | 0.31123 | 1.000 | 0.000 | 1a | 1 |

# SO<sub>2</sub>/TiO<sub>2</sub>-ZnO

Title SO<sub>2</sub>/TiO<sub>2</sub>-ZnO

Lattice type P  
Space group name P 1  
Space group number 1  
Setting number 1

Lattice parameters

| a        | b        | c        | alpha   | beta    | gamma   |
|----------|----------|----------|---------|---------|---------|
| 19.18780 | 10.31040 | 29.67230 | 90.0000 | 90.0000 | 90.0000 |

Unit-cell volume = 5870.186532 Å<sup>3</sup>

Structure parameters

|      |     | x       | y       | z        | Occ.  | U     | Site | Sym. |
|------|-----|---------|---------|----------|-------|-------|------|------|
| 1 Zn | Zn1 | 0.03186 | 0.02243 | 0.01681  | 1.000 | 0.000 | 1a   | 1    |
| 2 Zn | Zn2 | 0.10943 | 1.00490 | 0.11106  | 1.000 | 0.000 | 1a   | 1    |
| 3 O  | O3  | 0.02946 | 0.19036 | -0.00747 | 1.000 | 0.000 | 1a   | 1    |
| 4 O  | O4  | 0.11381 | 0.18520 | 0.08852  | 1.000 | 0.000 | 1a   | 1    |
| 5 Zn | Zn5 | 0.11391 | 0.25396 | 0.02033  | 1.000 | 0.000 | 1a   | 1    |
| 6 Zn | Zn6 | 0.03469 | 0.26144 | 0.12249  | 1.000 | 0.000 | 1a   | 1    |
| 7 O  | O7  | 0.11328 | 0.44414 | 0.02965  | 1.000 | 0.000 | 1a   | 1    |

|       |      |         |         |          |       |       |    |   |
|-------|------|---------|---------|----------|-------|-------|----|---|
| 8 O   | O8   | 0.04202 | 0.44626 | 0.13673  | 1.000 | 0.000 | 1a | 1 |
| 9 Zn  | Zn9  | 0.19757 | 0.02197 | 0.01895  | 1.000 | 0.000 | 1a | 1 |
| 10 Zn | Zn10 | 0.28366 | 1.00402 | 0.11067  | 1.000 | 0.000 | 1a | 1 |
| 11 O  | O11  | 0.19718 | 0.18653 | -0.00820 | 1.000 | 0.000 | 1a | 1 |
| 12 O  | O12  | 0.28232 | 0.18303 | 0.08641  | 1.000 | 0.000 | 1a | 1 |
| 13 Zn | Zn13 | 0.28167 | 0.25321 | 0.01849  | 1.000 | 0.000 | 1a | 1 |
| 14 Zn | Zn14 | 0.19878 | 0.25823 | 0.11369  | 1.000 | 0.000 | 1a | 1 |
| 15 O  | O15  | 0.28249 | 0.44397 | 0.02750  | 1.000 | 0.000 | 1a | 1 |
| 16 O  | O16  | 0.19961 | 0.43945 | 0.12261  | 1.000 | 0.000 | 1a | 1 |
| 17 Zn | Zn17 | 0.36348 | 0.02156 | 0.01828  | 1.000 | 0.000 | 1a | 1 |
| 18 Zn | Zn18 | 0.45608 | 1.00536 | 0.10836  | 1.000 | 0.000 | 1a | 1 |
| 19 O  | O19  | 0.36659 | 0.18723 | -0.00792 | 1.000 | 0.000 | 1a | 1 |
| 20 O  | O20  | 0.44400 | 0.19133 | 0.09236  | 1.000 | 0.000 | 1a | 1 |
| 21 Zn | Zn21 | 0.44519 | 0.25637 | 0.02543  | 1.000 | 0.000 | 1a | 1 |
| 22 Zn | Zn22 | 0.36022 | 0.25816 | 0.12157  | 1.000 | 0.000 | 1a | 1 |
| 23 O  | O23  | 0.44549 | 0.44395 | 0.04070  | 1.000 | 0.000 | 1a | 1 |
| 24 O  | O24  | 0.35181 | 0.44329 | 0.13574  | 1.000 | 0.000 | 1a | 1 |
| 25 Zn | Zn25 | 0.52689 | 0.02634 | 0.00954  | 1.000 | 0.000 | 1a | 1 |
| 26 Zn | Zn26 | 0.61606 | 1.00701 | 0.09635  | 1.000 | 0.000 | 1a | 1 |
| 27 O  | O27  | 0.52822 | 0.20167 | -0.00712 | 1.000 | 0.000 | 1a | 1 |
| 28 O  | O28  | 0.61106 | 0.19807 | 0.09031  | 1.000 | 0.000 | 1a | 1 |
| 29 Zn | Zn29 | 0.61281 | 0.25719 | 0.02234  | 1.000 | 0.000 | 1a | 1 |
| 30 Zn | Zn30 | 0.52904 | 0.26144 | 0.12096  | 1.000 | 0.000 | 1a | 1 |
| 31 O  | O31  | 0.61383 | 0.44029 | 0.04261  | 1.000 | 0.000 | 1a | 1 |
| 32 O  | O32  | 0.52266 | 0.44611 | 0.14171  | 1.000 | 0.000 | 1a | 1 |
| 33 Zn | Zn33 | 0.69718 | 0.02435 | 0.00516  | 1.000 | 0.000 | 1a | 1 |
| 34 Zn | Zn34 | 0.78071 | 1.00742 | 0.09434  | 1.000 | 0.000 | 1a | 1 |
| 35 O  | O35  | 0.69735 | 0.20290 | -0.00767 | 1.000 | 0.000 | 1a | 1 |
| 36 O  | O36  | 0.78370 | 0.19924 | 0.08984  | 1.000 | 0.000 | 1a | 1 |
| 37 Zn | Zn37 | 0.78226 | 0.25790 | 0.02194  | 1.000 | 0.000 | 1a | 1 |
| 38 Zn | Zn38 | 0.69771 | 0.26301 | 0.11635  | 1.000 | 0.000 | 1a | 1 |
| 39 O  | O39  | 0.78107 | 0.44077 | 0.04253  | 1.000 | 0.000 | 1a | 1 |
| 40 O  | O40  | 0.69704 | 0.44706 | 0.14165  | 1.000 | 0.000 | 1a | 1 |
| 41 Zn | Zn41 | 0.86854 | 0.02672 | 0.00843  | 1.000 | 0.000 | 1a | 1 |
| 42 Zn | Zn42 | 0.94069 | 1.00714 | 0.10762  | 1.000 | 0.000 | 1a | 1 |
| 43 O  | O43  | 0.86704 | 0.20284 | -0.00728 | 1.000 | 0.000 | 1a | 1 |
| 44 O  | O44  | 0.95151 | 0.19387 | 0.09256  | 1.000 | 0.000 | 1a | 1 |
| 45 Zn | Zn45 | 0.94997 | 0.25694 | 0.02566  | 1.000 | 0.000 | 1a | 1 |
| 46 Zn | Zn46 | 0.86594 | 0.26262 | 0.12059  | 1.000 | 0.000 | 1a | 1 |
| 47 O  | O47  | 0.94923 | 0.44422 | 0.04095  | 1.000 | 0.000 | 1a | 1 |
| 48 O  | O48  | 0.87150 | 0.44680 | 0.14232  | 1.000 | 0.000 | 1a | 1 |
| 49 Zn | Zn49 | 0.02709 | 0.52623 | 0.01014  | 1.000 | 0.000 | 1a | 1 |
| 50 Zn | Zn50 | 0.11597 | 0.50710 | 0.09718  | 1.000 | 0.000 | 1a | 1 |
| 51 O  | O51  | 0.02843 | 0.70134 | -0.00681 | 1.000 | 0.000 | 1a | 1 |
| 52 O  | O52  | 0.11076 | 0.69821 | 0.09063  | 1.000 | 0.000 | 1a | 1 |
| 53 Zn | Zn53 | 0.11241 | 0.75745 | 0.02308  | 1.000 | 0.000 | 1a | 1 |
| 54 Zn | Zn54 | 0.02884 | 0.76191 | 0.12188  | 1.000 | 0.000 | 1a | 1 |
| 55 O  | O55  | 0.11358 | 0.94098 | 0.04303  | 1.000 | 0.000 | 1a | 1 |
| 56 O  | O56  | 0.02227 | 0.94646 | 0.14261  | 1.000 | 0.000 | 1a | 1 |
| 57 Zn | Zn57 | 0.19690 | 0.52410 | 0.00572  | 1.000 | 0.000 | 1a | 1 |
| 58 Zn | Zn58 | 0.28048 | 0.50644 | 0.09398  | 1.000 | 0.000 | 1a | 1 |
| 59 O  | O59  | 0.19796 | 0.70310 | -0.00600 | 1.000 | 0.000 | 1a | 1 |
| 60 O  | O60  | 0.28437 | 0.69897 | 0.09265  | 1.000 | 0.000 | 1a | 1 |
| 61 Zn | Zn61 | 0.28246 | 0.75652 | 0.02421  | 1.000 | 0.000 | 1a | 1 |
| 62 Zn | Zn62 | 0.19689 | 0.76273 | 0.11724  | 1.000 | 0.000 | 1a | 1 |
| 63 O  | O63  | 0.28120 | 0.93979 | 0.04346  | 1.000 | 0.000 | 1a | 1 |
| 64 O  | O64  | 0.19687 | 0.94756 | 0.14193  | 1.000 | 0.000 | 1a | 1 |
| 65 Zn | Zn65 | 0.36881 | 0.52701 | 0.00885  | 1.000 | 0.000 | 1a | 1 |
| 66 Zn | Zn66 | 0.43971 | 0.50591 | 0.10857  | 1.000 | 0.000 | 1a | 1 |
| 67 O  | O67  | 0.36687 | 0.70350 | -0.00576 | 1.000 | 0.000 | 1a | 1 |
| 68 O  | O68  | 0.45021 | 0.69357 | 0.09479  | 1.000 | 0.000 | 1a | 1 |
| 69 Zn | Zn69 | 0.44931 | 0.75620 | 0.02787  | 1.000 | 0.000 | 1a | 1 |

|        |       |         |          |          |       |       |    |   |
|--------|-------|---------|----------|----------|-------|-------|----|---|
| 70 Zn  | Zn70  | 0.36560 | 0.75308  | 0.12648  | 1.000 | 0.000 | 1a | 1 |
| 71 O   | O71   | 0.44976 | 0.94417  | 0.04152  | 1.000 | 0.000 | 1a | 1 |
| 72 O   | O72   | 0.37266 | 0.94748  | 0.14294  | 1.000 | 0.000 | 1a | 1 |
| 73 Zn  | Zn73  | 0.53169 | 0.52216  | 0.01758  | 1.000 | 0.000 | 1a | 1 |
| 74 Zn  | Zn74  | 0.61053 | 0.50503  | 0.11048  | 1.000 | 0.000 | 1a | 1 |
| 75 O   | O75   | 0.52777 | 0.69012  | -0.00646 | 1.000 | 0.000 | 1a | 1 |
| 76 O   | O76   | 0.61341 | 0.68492  | 0.08740  | 1.000 | 0.000 | 1a | 1 |
| 77 Zn  | Zn77  | 0.61348 | 0.75436  | 0.01946  | 1.000 | 0.000 | 1a | 1 |
| 78 Zn  | Zn78  | 0.53530 | 0.75899  | 0.12265  | 1.000 | 0.000 | 1a | 1 |
| 79 O   | O79   | 0.61299 | 0.94459  | 0.02906  | 1.000 | 0.000 | 1a | 1 |
| 80 O   | O80   | 0.54318 | 0.94479  | 0.13723  | 1.000 | 0.000 | 1a | 1 |
| 81 Zn  | Zn81  | 0.69754 | 0.52283  | 0.01838  | 1.000 | 0.000 | 1a | 1 |
| 82 Zn  | Zn82  | 0.78433 | 0.50508  | 0.11071  | 1.000 | 0.000 | 1a | 1 |
| 83 O   | O83   | 0.69714 | 0.68771  | -0.00850 | 1.000 | 0.000 | 1a | 1 |
| 84 O   | O84   | 0.78135 | 0.68457  | 0.08747  | 1.000 | 0.000 | 1a | 1 |
| 85 Zn  | Zn85  | 0.78132 | 0.75383  | 0.01927  | 1.000 | 0.000 | 1a | 1 |
| 86 Zn  | Zn86  | 0.69746 | 0.75997  | 0.11375  | 1.000 | 0.000 | 1a | 1 |
| 87 O   | O87   | 0.78211 | 0.94452  | 0.02738  | 1.000 | 0.000 | 1a | 1 |
| 88 O   | O88   | 0.69902 | 0.94082  | 0.12257  | 1.000 | 0.000 | 1a | 1 |
| 89 Zn  | Zn89  | 0.86360 | 0.52231  | 0.01748  | 1.000 | 0.000 | 1a | 1 |
| 90 Zn  | Zn90  | 0.95477 | 0.50749  | 0.10889  | 1.000 | 0.000 | 1a | 1 |
| 91 O   | O91   | 0.86621 | 0.68925  | -0.00759 | 1.000 | 0.000 | 1a | 1 |
| 92 O   | O92   | 0.94376 | 0.69340  | 0.09290  | 1.000 | 0.000 | 1a | 1 |
| 93 Zn  | Zn93  | 0.94532 | 0.75635  | 0.02586  | 1.000 | 0.000 | 1a | 1 |
| 94 Zn  | Zn94  | 0.85966 | 0.76111  | 0.12208  | 1.000 | 0.000 | 1a | 1 |
| 95 O   | O95   | 0.94599 | 0.94446  | 0.03967  | 1.000 | 0.000 | 1a | 1 |
| 96 O   | O96   | 0.85348 | 0.94607  | 0.13439  | 1.000 | 0.000 | 1a | 1 |
| 97 Ti  | Ti97  | 0.19188 | 0.62942  | 0.23116  | 1.000 | 0.000 | 1a | 1 |
| 98 Ti  | Ti98  | 0.09528 | 0.13662  | 0.23334  | 1.000 | 0.000 | 1a | 1 |
| 99 Ti  | Ti99  | 0.09028 | 0.40375  | 0.21547  | 1.000 | 0.000 | 1a | 1 |
| 100 Ti | Ti100 | 0.19419 | -0.09880 | 0.21496  | 1.000 | 0.000 | 1a | 1 |
| 101 O  | O101  | 0.19123 | 0.44083  | 0.21229  | 1.000 | 0.000 | 1a | 1 |
| 102 O  | O102  | 0.09690 | -0.05671 | 0.21939  | 1.000 | 0.000 | 1a | 1 |
| 103 O  | O103  | 0.09271 | 0.23120  | 0.18209  | 1.000 | 0.000 | 1a | 1 |
| 104 O  | O104  | 0.18401 | 0.72728  | 0.18228  | 1.000 | 0.000 | 1a | 1 |
| 105 O  | O105  | 0.19416 | 0.09091  | 0.23974  | 1.000 | 0.000 | 1a | 1 |
| 106 O  | O106  | 0.09166 | 0.58267  | 0.23951  | 1.000 | 0.000 | 1a | 1 |
| 107 O  | O107  | 0.09359 | 0.29460  | 0.26354  | 1.000 | 0.000 | 1a | 1 |
| 108 O  | O108  | 0.19921 | -0.21540 | 0.26249  | 1.000 | 0.000 | 1a | 1 |
| 109 Ti | Ti109 | 0.39669 | 0.62030  | 0.24002  | 1.000 | 0.000 | 1a | 1 |
| 110 Ti | Ti110 | 0.29153 | 0.14258  | 0.23096  | 1.000 | 0.000 | 1a | 1 |
| 111 Ti | Ti111 | 0.29567 | 0.40896  | 0.20912  | 1.000 | 0.000 | 1a | 1 |
| 112 Ti | Ti112 | 0.38928 | -0.08959 | 0.21114  | 1.000 | 0.000 | 1a | 1 |
| 113 O  | O113  | 0.39880 | 0.44336  | 0.21812  | 1.000 | 0.000 | 1a | 1 |
| 114 O  | O114  | 0.29077 | -0.05152 | 0.21474  | 1.000 | 0.000 | 1a | 1 |
| 115 O  | O115  | 0.29214 | 0.23145  | 0.17808  | 1.000 | 0.000 | 1a | 1 |
| 116 O  | O116  | 0.40040 | 0.73259  | 0.18925  | 1.000 | 0.000 | 1a | 1 |
| 117 O  | O117  | 0.38980 | 0.09321  | 0.23828  | 1.000 | 0.000 | 1a | 1 |
| 118 O  | O118  | 0.29351 | 0.58648  | 0.23018  | 1.000 | 0.000 | 1a | 1 |
| 119 O  | O119  | 0.29328 | 0.30386  | 0.25853  | 1.000 | 0.000 | 1a | 1 |
| 120 O  | O120  | 0.38348 | -0.19242 | 0.26634  | 1.000 | 0.000 | 1a | 1 |
| 121 Ti | Ti121 | 0.59725 | 0.63877  | 0.23180  | 1.000 | 0.000 | 1a | 1 |
| 122 Ti | Ti122 | 0.49055 | 0.13681  | 0.23356  | 1.000 | 0.000 | 1a | 1 |
| 123 Ti | Ti123 | 0.50041 | 0.40532  | 0.21483  | 1.000 | 0.000 | 1a | 1 |
| 124 Ti | Ti124 | 0.58905 | -0.09340 | 0.21275  | 1.000 | 0.000 | 1a | 1 |
| 125 O  | O125  | 0.59848 | 0.44264  | 0.21690  | 1.000 | 0.000 | 1a | 1 |
| 126 O  | O126  | 0.48805 | -0.05569 | 0.21821  | 1.000 | 0.000 | 1a | 1 |
| 127 O  | O127  | 0.48769 | 0.23007  | 0.18280  | 1.000 | 0.000 | 1a | 1 |
| 128 O  | O128  | 0.59713 | 0.73154  | 0.18004  | 1.000 | 0.000 | 1a | 1 |
| 129 O  | O129  | 0.59195 | 0.08525  | 0.23514  | 1.000 | 0.000 | 1a | 1 |
| 130 O  | O130  | 0.49915 | 0.58744  | 0.23744  | 1.000 | 0.000 | 1a | 1 |
| 131 O  | O131  | 0.50029 | 0.29191  | 0.26339  | 1.000 | 0.000 | 1a | 1 |

|        |       |         |          |         |       |       |    |   |
|--------|-------|---------|----------|---------|-------|-------|----|---|
| 132 O  | O132  | 0.59150 | -0.20279 | 0.26106 | 1.000 | 0.000 | 1a | 1 |
| 133 Ti | Ti133 | 0.79336 | 0.63681  | 0.23234 | 1.000 | 0.000 | 1a | 1 |
| 134 Ti | Ti134 | 0.69367 | 0.12768  | 0.23113 | 1.000 | 0.000 | 1a | 1 |
| 135 Ti | Ti135 | 0.69558 | 0.39891  | 0.21454 | 1.000 | 0.000 | 1a | 1 |
| 136 Ti | Ti136 | 0.79679 | -0.09596 | 0.21470 | 1.000 | 0.000 | 1a | 1 |
| 137 O  | O137  | 0.79245 | 0.44330  | 0.21727 | 1.000 | 0.000 | 1a | 1 |
| 138 O  | O138  | 0.69349 | -0.06035 | 0.21372 | 1.000 | 0.000 | 1a | 1 |
| 139 O  | O139  | 0.69485 | 0.22466  | 0.18171 | 1.000 | 0.000 | 1a | 1 |
| 140 O  | O140  | 0.79631 | 0.73256  | 0.18099 | 1.000 | 0.000 | 1a | 1 |
| 141 O  | O141  | 0.79550 | 0.08329  | 0.23633 | 1.000 | 0.000 | 1a | 1 |
| 142 O  | O142  | 0.69515 | 0.58965  | 0.23922 | 1.000 | 0.000 | 1a | 1 |
| 143 O  | O143  | 0.69485 | 0.28355  | 0.26225 | 1.000 | 0.000 | 1a | 1 |
| 144 O  | O144  | 0.79398 | -0.20474 | 0.26258 | 1.000 | 0.000 | 1a | 1 |
| 145 Ti | Ti145 | 0.99146 | 0.63352  | 0.23500 | 1.000 | 0.000 | 1a | 1 |
| 146 Ti | Ti146 | 0.89651 | 0.13236  | 0.23388 | 1.000 | 0.000 | 1a | 1 |
| 147 Ti | Ti147 | 0.89120 | 0.40191  | 0.21624 | 1.000 | 0.000 | 1a | 1 |
| 148 Ti | Ti148 | 0.99764 | -0.09743 | 0.21679 | 1.000 | 0.000 | 1a | 1 |
| 149 O  | O149  | 0.98931 | 0.44043  | 0.21931 | 1.000 | 0.000 | 1a | 1 |
| 150 O  | O150  | 0.89856 | -0.06070 | 0.21882 | 1.000 | 0.000 | 1a | 1 |
| 151 O  | O151  | 0.90070 | 0.22742  | 0.18369 | 1.000 | 0.000 | 1a | 1 |
| 152 O  | O152  | 0.99021 | 0.72730  | 0.18437 | 1.000 | 0.000 | 1a | 1 |
| 153 O  | O153  | 0.99668 | 0.08591  | 0.24085 | 1.000 | 0.000 | 1a | 1 |
| 154 O  | O154  | 0.89125 | 0.58640  | 0.24088 | 1.000 | 0.000 | 1a | 1 |
| 155 O  | O155  | 0.88915 | 0.28732  | 0.26438 | 1.000 | 0.000 | 1a | 1 |
| 156 O  | O156  | 0.99772 | -0.21076 | 0.26518 | 1.000 | 0.000 | 1a | 1 |
| 157 S  | S157  | 0.36813 | -0.24520 | 0.32206 | 1.000 | 0.000 | 1a | 1 |
| 158 O  | O158  | 0.42214 | -0.18621 | 0.35090 | 1.000 | 0.000 | 1a | 1 |
| 159 O  | O159  | 0.39205 | -0.38980 | 0.30584 | 1.000 | 0.000 | 1a | 1 |

# SOF<sub>2</sub>/TiO<sub>2</sub>-ZnO

Title SOF<sub>2</sub>/TiO<sub>2</sub>-ZnO

Lattice type P  
Space group name P 1  
Space group number 1  
Setting number 1

Lattice parameters

| a        | b        | c        | alpha   | beta    | gamma   |
|----------|----------|----------|---------|---------|---------|
| 19.18780 | 10.31040 | 29.67230 | 90.0000 | 90.0000 | 90.0000 |

Unit-cell volume = 5870.186532 Å<sup>3</sup>

Structure parameters

|       |      | x       | y       | z        | Occ.  | U     | Site | Sym. |
|-------|------|---------|---------|----------|-------|-------|------|------|
| 1 Zn  | Zn1  | 0.02654 | 0.02883 | 0.01820  | 1.000 | 0.000 | 1a   | 1    |
| 2 Zn  | Zn2  | 0.10706 | 1.01078 | 0.11111  | 1.000 | 0.000 | 1a   | 1    |
| 3 O   | O3   | 0.02431 | 0.19474 | -0.00767 | 1.000 | 0.000 | 1a   | 1    |
| 4 O   | O4   | 0.10896 | 0.19031 | 0.08796  | 1.000 | 0.000 | 1a   | 1    |
| 5 Zn  | Zn5  | 0.10877 | 0.26055 | 0.01926  | 1.000 | 0.000 | 1a   | 1    |
| 6 Zn  | Zn6  | 0.03056 | 0.26787 | 0.12198  | 1.000 | 0.000 | 1a   | 1    |
| 7 O   | O7   | 0.10868 | 0.45111 | 0.02726  | 1.000 | 0.000 | 1a   | 1    |
| 8 O   | O8   | 0.03534 | 0.45231 | 0.13256  | 1.000 | 0.000 | 1a   | 1    |
| 9 Zn  | Zn9  | 0.19231 | 0.02926 | 0.01827  | 1.000 | 0.000 | 1a   | 1    |
| 10 Zn | Zn10 | 0.28079 | 1.01132 | 0.10966  | 1.000 | 0.000 | 1a   | 1    |
| 11 O  | O11  | 0.19247 | 0.19397 | -0.00871 | 1.000 | 0.000 | 1a   | 1    |

|       |      |         |         |          |       |       |    |   |
|-------|------|---------|---------|----------|-------|-------|----|---|
| 12 O  | O12  | 0.27591 | 0.19174 | 0.08702  | 1.000 | 0.000 | 1a | 1 |
| 13 Zn | Zn13 | 0.27596 | 0.26172 | 0.01919  | 1.000 | 0.000 | 1a | 1 |
| 14 Zn | Zn14 | 0.19256 | 0.26779 | 0.11360  | 1.000 | 0.000 | 1a | 1 |
| 15 O  | O15  | 0.27692 | 0.45138 | 0.02981  | 1.000 | 0.000 | 1a | 1 |
| 16 O  | O16  | 0.19131 | 0.44812 | 0.12372  | 1.000 | 0.000 | 1a | 1 |
| 17 Zn | Zn17 | 0.35712 | 0.02979 | 0.01352  | 1.000 | 0.000 | 1a | 1 |
| 18 Zn | Zn18 | 0.44700 | 1.01398 | 0.10361  | 1.000 | 0.000 | 1a | 1 |
| 19 O  | O19  | 0.36031 | 0.19948 | -0.00925 | 1.000 | 0.000 | 1a | 1 |
| 20 O  | O20  | 0.43855 | 0.20243 | 0.09112  | 1.000 | 0.000 | 1a | 1 |
| 21 Zn | Zn21 | 0.44046 | 0.26298 | 0.02391  | 1.000 | 0.000 | 1a | 1 |
| 22 Zn | Zn22 | 0.35507 | 0.26827 | 0.12033  | 1.000 | 0.000 | 1a | 1 |
| 23 O  | O23  | 0.44092 | 0.44948 | 0.04065  | 1.000 | 0.000 | 1a | 1 |
| 24 O  | O24  | 0.34797 | 0.45188 | 0.13705  | 1.000 | 0.000 | 1a | 1 |
| 25 Zn | Zn25 | 0.52311 | 0.03203 | 0.00756  | 1.000 | 0.000 | 1a | 1 |
| 26 Zn | Zn26 | 0.60943 | 1.01269 | 0.09500  | 1.000 | 0.000 | 1a | 1 |
| 27 O  | O27  | 0.52438 | 0.20884 | -0.00765 | 1.000 | 0.000 | 1a | 1 |
| 28 O  | O28  | 0.60799 | 0.20493 | 0.08968  | 1.000 | 0.000 | 1a | 1 |
| 29 Zn | Zn29 | 0.60877 | 0.26409 | 0.02204  | 1.000 | 0.000 | 1a | 1 |
| 30 Zn | Zn30 | 0.52458 | 0.26702 | 0.11924  | 1.000 | 0.000 | 1a | 1 |
| 31 O  | O31  | 0.60928 | 0.44684 | 0.04321  | 1.000 | 0.000 | 1a | 1 |
| 32 O  | O32  | 0.51921 | 0.45119 | 0.14238  | 1.000 | 0.000 | 1a | 1 |
| 33 Zn | Zn33 | 0.69399 | 0.03131 | 0.00590  | 1.000 | 0.000 | 1a | 1 |
| 34 Zn | Zn34 | 0.77422 | 1.01408 | 0.09849  | 1.000 | 0.000 | 1a | 1 |
| 35 O  | O35  | 0.69391 | 0.20962 | -0.00732 | 1.000 | 0.000 | 1a | 1 |
| 36 O  | O36  | 0.78029 | 0.20458 | 0.09114  | 1.000 | 0.000 | 1a | 1 |
| 37 Zn | Zn37 | 0.77816 | 0.26369 | 0.02328  | 1.000 | 0.000 | 1a | 1 |
| 38 Zn | Zn38 | 0.69325 | 0.26725 | 0.11712  | 1.000 | 0.000 | 1a | 1 |
| 39 O  | O39  | 0.77721 | 0.44751 | 0.04286  | 1.000 | 0.000 | 1a | 1 |
| 40 O  | O40  | 0.69483 | 0.45122 | 0.14238  | 1.000 | 0.000 | 1a | 1 |
| 41 Zn | Zn41 | 0.86315 | 0.03227 | 0.01091  | 1.000 | 0.000 | 1a | 1 |
| 42 Zn | Zn42 | 0.93607 | 1.01304 | 0.10948  | 1.000 | 0.000 | 1a | 1 |
| 43 O  | O43  | 0.86183 | 0.20658 | -0.00687 | 1.000 | 0.000 | 1a | 1 |
| 44 O  | O44  | 0.94708 | 0.19787 | 0.09225  | 1.000 | 0.000 | 1a | 1 |
| 45 Zn | Zn45 | 0.94503 | 0.26279 | 0.02525  | 1.000 | 0.000 | 1a | 1 |
| 46 Zn | Zn46 | 0.86288 | 0.26888 | 0.12131  | 1.000 | 0.000 | 1a | 1 |
| 47 O  | O47  | 0.94394 | 0.45127 | 0.03807  | 1.000 | 0.000 | 1a | 1 |
| 48 O  | O48  | 0.86894 | 0.45251 | 0.14179  | 1.000 | 0.000 | 1a | 1 |
| 49 Zn | Zn49 | 0.02250 | 0.53318 | 0.00792  | 1.000 | 0.000 | 1a | 1 |
| 50 Zn | Zn50 | 0.10991 | 0.51353 | 0.09442  | 1.000 | 0.000 | 1a | 1 |
| 51 O  | O51  | 0.02375 | 0.70970 | -0.00738 | 1.000 | 0.000 | 1a | 1 |
| 52 O  | O52  | 0.10772 | 0.70553 | 0.08971  | 1.000 | 0.000 | 1a | 1 |
| 53 Zn | Zn53 | 0.10857 | 0.76465 | 0.02191  | 1.000 | 0.000 | 1a | 1 |
| 54 Zn | Zn54 | 0.02508 | 0.76848 | 0.11995  | 1.000 | 0.000 | 1a | 1 |
| 55 O  | O55  | 0.10923 | 0.94712 | 0.04305  | 1.000 | 0.000 | 1a | 1 |
| 56 O  | O56  | 0.01968 | 0.95226 | 0.14284  | 1.000 | 0.000 | 1a | 1 |
| 57 Zn | Zn57 | 0.19357 | 0.53180 | 0.00515  | 1.000 | 0.000 | 1a | 1 |
| 58 Zn | Zn58 | 0.27423 | 0.51500 | 0.09707  | 1.000 | 0.000 | 1a | 1 |
| 59 O  | O59  | 0.19331 | 0.71012 | -0.00787 | 1.000 | 0.000 | 1a | 1 |
| 60 O  | O60  | 0.28008 | 0.70546 | 0.09010  | 1.000 | 0.000 | 1a | 1 |
| 61 Zn | Zn61 | 0.27817 | 0.76406 | 0.02214  | 1.000 | 0.000 | 1a | 1 |
| 62 Zn | Zn62 | 0.19349 | 0.76929 | 0.11636  | 1.000 | 0.000 | 1a | 1 |
| 63 O  | O63  | 0.27684 | 0.94796 | 0.04153  | 1.000 | 0.000 | 1a | 1 |
| 64 O  | O64  | 0.19470 | 0.95277 | 0.14200  | 1.000 | 0.000 | 1a | 1 |
| 65 Zn | Zn65 | 0.36328 | 0.53208 | 0.00981  | 1.000 | 0.000 | 1a | 1 |
| 66 Zn | Zn66 | 0.43602 | 0.51247 | 0.10863  | 1.000 | 0.000 | 1a | 1 |
| 67 O  | O67  | 0.36190 | 0.70646 | -0.00780 | 1.000 | 0.000 | 1a | 1 |
| 68 O  | O68  | 0.44699 | 0.69719 | 0.09159  | 1.000 | 0.000 | 1a | 1 |
| 69 Zn | Zn69 | 0.44497 | 0.76250 | 0.02464  | 1.000 | 0.000 | 1a | 1 |
| 70 Zn | Zn70 | 0.36287 | 0.76878 | 0.12051  | 1.000 | 0.000 | 1a | 1 |
| 71 O  | O71  | 0.44275 | 0.95148 | 0.03611  | 1.000 | 0.000 | 1a | 1 |
| 72 O  | O72  | 0.36800 | 0.95234 | 0.14080  | 1.000 | 0.000 | 1a | 1 |
| 73 Zn | Zn73 | 0.52672 | 0.52834 | 0.01793  | 1.000 | 0.000 | 1a | 1 |

|        |       |         |          |          |       |       |    |   |
|--------|-------|---------|----------|----------|-------|-------|----|---|
| 74 Zn  | Zn74  | 0.60707 | 0.50927  | 0.11121  | 1.000 | 0.000 | 1a | 1 |
| 75 O   | O75   | 0.52523 | 0.69491  | -0.00739 | 1.000 | 0.000 | 1a | 1 |
| 76 O   | O76   | 0.60923 | 0.68993  | 0.08945  | 1.000 | 0.000 | 1a | 1 |
| 77 Zn  | Zn77  | 0.60910 | 0.75996  | 0.02062  | 1.000 | 0.000 | 1a | 1 |
| 78 Zn  | Zn78  | 0.52990 | 0.76809  | 0.12249  | 1.000 | 0.000 | 1a | 1 |
| 79 O   | O79   | 0.60903 | 0.95068  | 0.02759  | 1.000 | 0.000 | 1a | 1 |
| 80 O   | O80   | 0.53206 | 0.95278  | 0.13023  | 1.000 | 0.000 | 1a | 1 |
| 81 Zn  | Zn81  | 0.69294 | 0.52851  | 0.01902  | 1.000 | 0.000 | 1a | 1 |
| 82 Zn  | Zn82  | 0.78124 | 0.51122  | 0.11079  | 1.000 | 0.000 | 1a | 1 |
| 83 O   | O83   | 0.69297 | 0.69383  | -0.00736 | 1.000 | 0.000 | 1a | 1 |
| 84 O   | O84   | 0.77613 | 0.69209  | 0.08878  | 1.000 | 0.000 | 1a | 1 |
| 85 Zn  | Zn85  | 0.77623 | 0.76138  | 0.02081  | 1.000 | 0.000 | 1a | 1 |
| 86 Zn  | Zn86  | 0.69254 | 0.76825  | 0.11519  | 1.000 | 0.000 | 1a | 1 |
| 87 O   | O87   | 0.77710 | 0.95113  | 0.03111  | 1.000 | 0.000 | 1a | 1 |
| 88 O   | O88   | 0.69076 | 0.94879  | 0.12503  | 1.000 | 0.000 | 1a | 1 |
| 89 Zn  | Zn89  | 0.85799 | 0.52943  | 0.01558  | 1.000 | 0.000 | 1a | 1 |
| 90 Zn  | Zn90  | 0.94927 | 0.51380  | 0.10580  | 1.000 | 0.000 | 1a | 1 |
| 91 O   | O91   | 0.86041 | 0.69851  | -0.00769 | 1.000 | 0.000 | 1a | 1 |
| 92 O   | O92   | 0.93913 | 0.70139  | 0.09217  | 1.000 | 0.000 | 1a | 1 |
| 93 Zn  | Zn93  | 0.94052 | 0.76348  | 0.02509  | 1.000 | 0.000 | 1a | 1 |
| 94 Zn  | Zn94  | 0.85592 | 0.76764  | 0.12191  | 1.000 | 0.000 | 1a | 1 |
| 95 O   | O95   | 0.94108 | 0.94996  | 0.04160  | 1.000 | 0.000 | 1a | 1 |
| 96 O   | O96   | 0.84857 | 0.95169  | 0.13816  | 1.000 | 0.000 | 1a | 1 |
| 97 Ti  | Ti97  | 0.19946 | 0.63289  | 0.23124  | 1.000 | 0.000 | 1a | 1 |
| 98 Ti  | Ti98  | 0.09978 | 0.13852  | 0.23233  | 1.000 | 0.000 | 1a | 1 |
| 99 Ti  | Ti99  | 0.09752 | 0.40576  | 0.21740  | 1.000 | 0.000 | 1a | 1 |
| 100 Ti | Ti100 | 0.19915 | -0.09598 | 0.21427  | 1.000 | 0.000 | 1a | 1 |
| 101 O  | O101  | 0.19975 | 0.44166  | 0.21517  | 1.000 | 0.000 | 1a | 1 |
| 102 O  | O102  | 0.10097 | -0.05361 | 0.21767  | 1.000 | 0.000 | 1a | 1 |
| 103 O  | O103  | 0.09595 | 0.23943  | 0.18209  | 1.000 | 0.000 | 1a | 1 |
| 104 O  | O104  | 0.19917 | 0.72875  | 0.18163  | 1.000 | 0.000 | 1a | 1 |
| 105 O  | O105  | 0.19891 | 0.09271  | 0.23816  | 1.000 | 0.000 | 1a | 1 |
| 106 O  | O106  | 0.09827 | 0.58715  | 0.23722  | 1.000 | 0.000 | 1a | 1 |
| 107 O  | O107  | 0.10020 | 0.29493  | 0.26438  | 1.000 | 0.000 | 1a | 1 |
| 108 O  | O108  | 0.19913 | -0.21216 | 0.26222  | 1.000 | 0.000 | 1a | 1 |
| 109 Ti | Ti109 | 0.40133 | 0.63749  | 0.23292  | 1.000 | 0.000 | 1a | 1 |
| 110 Ti | Ti110 | 0.29757 | 0.13978  | 0.23113  | 1.000 | 0.000 | 1a | 1 |
| 111 Ti | Ti111 | 0.30284 | 0.40755  | 0.21313  | 1.000 | 0.000 | 1a | 1 |
| 112 Ti | Ti112 | 0.39647 | -0.09330 | 0.21550  | 1.000 | 0.000 | 1a | 1 |
| 113 O  | O113  | 0.40351 | 0.44332  | 0.21797  | 1.000 | 0.000 | 1a | 1 |
| 114 O  | O114  | 0.29658 | -0.05497 | 0.21770  | 1.000 | 0.000 | 1a | 1 |
| 115 O  | O115  | 0.29749 | 0.23480  | 0.17992  | 1.000 | 0.000 | 1a | 1 |
| 116 O  | O116  | 0.40643 | 0.73338  | 0.18262  | 1.000 | 0.000 | 1a | 1 |
| 117 O  | O117  | 0.39688 | 0.08975  | 0.23799  | 1.000 | 0.000 | 1a | 1 |
| 118 O  | O118  | 0.30114 | 0.58787  | 0.23531  | 1.000 | 0.000 | 1a | 1 |
| 119 O  | O119  | 0.30158 | 0.29685  | 0.26127  | 1.000 | 0.000 | 1a | 1 |
| 120 O  | O120  | 0.39411 | -0.20781 | 0.26352  | 1.000 | 0.000 | 1a | 1 |
| 121 Ti | Ti121 | 0.59862 | 0.63600  | 0.23280  | 1.000 | 0.000 | 1a | 1 |
| 122 Ti | Ti122 | 0.49794 | 0.13431  | 0.23350  | 1.000 | 0.000 | 1a | 1 |
| 123 Ti | Ti123 | 0.50147 | 0.40368  | 0.21548  | 1.000 | 0.000 | 1a | 1 |
| 124 Ti | Ti124 | 0.59927 | -0.09604 | 0.22171  | 1.000 | 0.000 | 1a | 1 |
| 125 O  | O125  | 0.60047 | 0.44584  | 0.21756  | 1.000 | 0.000 | 1a | 1 |
| 126 O  | O126  | 0.49685 | -0.05828 | 0.21998  | 1.000 | 0.000 | 1a | 1 |
| 127 O  | O127  | 0.49761 | 0.22864  | 0.18320  | 1.000 | 0.000 | 1a | 1 |
| 128 O  | O128  | 0.59448 | 0.74335  | 0.18408  | 1.000 | 0.000 | 1a | 1 |
| 129 O  | O129  | 0.59876 | 0.08645  | 0.24043  | 1.000 | 0.000 | 1a | 1 |
| 130 O  | O130  | 0.50096 | 0.58850  | 0.24083  | 1.000 | 0.000 | 1a | 1 |
| 131 O  | O131  | 0.50165 | 0.29045  | 0.26384  | 1.000 | 0.000 | 1a | 1 |
| 132 O  | O132  | 0.60130 | -0.21047 | 0.26739  | 1.000 | 0.000 | 1a | 1 |
| 133 Ti | Ti133 | 0.79719 | 0.63983  | 0.23260  | 1.000 | 0.000 | 1a | 1 |
| 134 Ti | Ti134 | 0.69947 | 0.13394  | 0.23273  | 1.000 | 0.000 | 1a | 1 |
| 135 Ti | Ti135 | 0.69901 | 0.40428  | 0.21408  | 1.000 | 0.000 | 1a | 1 |

|        |       |         |          |         |       |       |    |   |
|--------|-------|---------|----------|---------|-------|-------|----|---|
| 136 Ti | Ti136 | 0.80360 | -0.09237 | 0.21507 | 1.000 | 0.000 | 1a | 1 |
| 137 O  | O137  | 0.79613 | 0.44544  | 0.21805 | 1.000 | 0.000 | 1a | 1 |
| 138 O  | O138  | 0.69990 | -0.05858 | 0.21733 | 1.000 | 0.000 | 1a | 1 |
| 139 O  | O139  | 0.69801 | 0.22727  | 0.18252 | 1.000 | 0.000 | 1a | 1 |
| 140 O  | O140  | 0.79827 | 0.73588  | 0.18160 | 1.000 | 0.000 | 1a | 1 |
| 141 O  | O141  | 0.80106 | 0.08867  | 0.23653 | 1.000 | 0.000 | 1a | 1 |
| 142 O  | O142  | 0.69834 | 0.59223  | 0.23761 | 1.000 | 0.000 | 1a | 1 |
| 143 O  | O143  | 0.69901 | 0.29034  | 0.26285 | 1.000 | 0.000 | 1a | 1 |
| 144 O  | O144  | 0.80129 | -0.20353 | 0.26303 | 1.000 | 0.000 | 1a | 1 |
| 145 Ti | Ti145 | 0.99715 | 0.63537  | 0.23349 | 1.000 | 0.000 | 1a | 1 |
| 146 Ti | Ti146 | 0.90169 | 0.13819  | 0.23385 | 1.000 | 0.000 | 1a | 1 |
| 147 Ti | Ti147 | 0.89579 | 0.40700  | 0.21611 | 1.000 | 0.000 | 1a | 1 |
| 148 Ti | Ti148 | 1.00227 | -0.09489 | 0.21620 | 1.000 | 0.000 | 1a | 1 |
| 149 O  | O149  | 0.99552 | 0.44228  | 0.21949 | 1.000 | 0.000 | 1a | 1 |
| 150 O  | O150  | 0.90366 | -0.05632 | 0.21993 | 1.000 | 0.000 | 1a | 1 |
| 151 O  | O151  | 0.90535 | 0.23305  | 0.18338 | 1.000 | 0.000 | 1a | 1 |
| 152 O  | O152  | 0.99421 | 0.73101  | 0.18347 | 1.000 | 0.000 | 1a | 1 |
| 153 O  | O153  | 1.00181 | 0.09010  | 0.24055 | 1.000 | 0.000 | 1a | 1 |
| 154 O  | O154  | 0.89631 | 0.58960  | 0.23926 | 1.000 | 0.000 | 1a | 1 |
| 155 O  | O155  | 0.89427 | 0.29277  | 0.26433 | 1.000 | 0.000 | 1a | 1 |
| 156 O  | O156  | 1.00358 | -0.20994 | 0.26425 | 1.000 | 0.000 | 1a | 1 |
| 157 S  | S157  | 0.61762 | 0.53544  | 0.32991 | 1.000 | 0.000 | 1a | 1 |
| 158 F  | F158  | 0.55699 | 0.60377  | 0.36163 | 1.000 | 0.000 | 1a | 1 |
| 159 F  | F159  | 0.59545 | 0.38717  | 0.34505 | 1.000 | 0.000 | 1a | 1 |
| 160 O  | O160  | 0.68514 | 0.56483  | 0.34989 | 1.000 | 0.000 | 1a | 1 |

# SO<sub>2</sub>F<sub>2</sub>/TiO<sub>2</sub>-ZnO

Title SO<sub>2</sub>F<sub>2</sub>/TiO<sub>2</sub>-ZnO

Lattice type P  
Space group name P 1  
Space group number 1  
Setting number 1

Lattice parameters

| a        | b        | c        | alpha   | beta    | gamma   |
|----------|----------|----------|---------|---------|---------|
| 19.18780 | 10.31040 | 29.67230 | 90.0000 | 90.0000 | 90.0000 |

Unit-cell volume = 5870.186532 Å<sup>3</sup>

Structure parameters

|       |      | x       | y       | z        | Occ.  | U     | Site | Sym. |
|-------|------|---------|---------|----------|-------|-------|------|------|
| 1 Zn  | Zn1  | 0.03159 | 0.02593 | 0.01707  | 1.000 | 0.000 | 1a   | 1    |
| 2 Zn  | Zn2  | 0.10916 | 1.00806 | 0.11173  | 1.000 | 0.000 | 1a   | 1    |
| 3 O   | O3   | 0.02970 | 0.19411 | -0.00698 | 1.000 | 0.000 | 1a   | 1    |
| 4 O   | O4   | 0.11376 | 0.18892 | 0.08969  | 1.000 | 0.000 | 1a   | 1    |
| 5 Zn  | Zn5  | 0.11360 | 0.25789 | 0.02168  | 1.000 | 0.000 | 1a   | 1    |
| 6 Zn  | Zn6  | 0.03360 | 0.26432 | 0.12267  | 1.000 | 0.000 | 1a   | 1    |
| 7 O   | O7   | 0.11288 | 0.44806 | 0.03096  | 1.000 | 0.000 | 1a   | 1    |
| 8 O   | O8   | 0.04037 | 0.44876 | 0.13703  | 1.000 | 0.000 | 1a   | 1    |
| 9 Zn  | Zn9  | 0.19692 | 0.02552 | 0.01976  | 1.000 | 0.000 | 1a   | 1    |
| 10 Zn | Zn10 | 0.28313 | 1.00682 | 0.11191  | 1.000 | 0.000 | 1a   | 1    |
| 11 O  | O11  | 0.19692 | 0.19081 | -0.00660 | 1.000 | 0.000 | 1a   | 1    |
| 12 O  | O12  | 0.28065 | 0.18764 | 0.09016  | 1.000 | 0.000 | 1a   | 1    |
| 13 Zn | Zn13 | 0.28070 | 0.25703 | 0.02146  | 1.000 | 0.000 | 1a   | 1    |
| 14 Zn | Zn14 | 0.19732 | 0.26575 | 0.11606  | 1.000 | 0.000 | 1a   | 1    |



|       |      |         |         |          |       |       |    |   |
|-------|------|---------|---------|----------|-------|-------|----|---|
| 15 O  | O15  | 0.28096 | 0.44788 | 0.02825  | 1.000 | 0.000 | 1a | 1 |
| 16 O  | O16  | 0.19871 | 0.44650 | 0.12551  | 1.000 | 0.000 | 1a | 1 |
| 17 Zn | Zn17 | 0.36304 | 0.02558 | 0.01823  | 1.000 | 0.000 | 1a | 1 |
| 18 Zn | Zn18 | 0.45427 | 1.00926 | 0.10815  | 1.000 | 0.000 | 1a | 1 |
| 19 O  | O19  | 0.36412 | 0.19195 | -0.00730 | 1.000 | 0.000 | 1a | 1 |
| 20 O  | O20  | 0.44285 | 0.19401 | 0.09089  | 1.000 | 0.000 | 1a | 1 |
| 21 Zn | Zn21 | 0.44468 | 0.26022 | 0.02409  | 1.000 | 0.000 | 1a | 1 |
| 22 Zn | Zn22 | 0.36069 | 0.26411 | 0.12303  | 1.000 | 0.000 | 1a | 1 |
| 23 O  | O23  | 0.44706 | 0.44900 | 0.03626  | 1.000 | 0.000 | 1a | 1 |
| 24 O  | O24  | 0.35791 | 0.44898 | 0.13088  | 1.000 | 0.000 | 1a | 1 |
| 25 Zn | Zn25 | 0.52611 | 0.02976 | 0.00854  | 1.000 | 0.000 | 1a | 1 |
| 26 Zn | Zn26 | 0.61556 | 1.01151 | 0.09502  | 1.000 | 0.000 | 1a | 1 |
| 27 O  | O27  | 0.52753 | 0.20443 | -0.00874 | 1.000 | 0.000 | 1a | 1 |
| 28 O  | O28  | 0.61022 | 0.20205 | 0.08890  | 1.000 | 0.000 | 1a | 1 |
| 29 Zn | Zn29 | 0.61190 | 0.26095 | 0.02066  | 1.000 | 0.000 | 1a | 1 |
| 30 Zn | Zn30 | 0.52745 | 0.26480 | 0.11922  | 1.000 | 0.000 | 1a | 1 |
| 31 O  | O31  | 0.61320 | 0.44438 | 0.04038  | 1.000 | 0.000 | 1a | 1 |
| 32 O  | O32  | 0.52249 | 0.44843 | 0.13983  | 1.000 | 0.000 | 1a | 1 |
| 33 Zn | Zn33 | 0.69685 | 0.02841 | 0.00416  | 1.000 | 0.000 | 1a | 1 |
| 34 Zn | Zn34 | 0.77988 | 1.01077 | 0.09367  | 1.000 | 0.000 | 1a | 1 |
| 35 O  | O35  | 0.69707 | 0.20677 | -0.00884 | 1.000 | 0.000 | 1a | 1 |
| 36 O  | O36  | 0.78294 | 0.20242 | 0.08893  | 1.000 | 0.000 | 1a | 1 |
| 37 Zn | Zn37 | 0.78182 | 0.26153 | 0.02100  | 1.000 | 0.000 | 1a | 1 |
| 38 Zn | Zn38 | 0.69678 | 0.26717 | 0.11496  | 1.000 | 0.000 | 1a | 1 |
| 39 O  | O39  | 0.78060 | 0.44401 | 0.04182  | 1.000 | 0.000 | 1a | 1 |
| 40 O  | O40  | 0.69574 | 0.45049 | 0.14055  | 1.000 | 0.000 | 1a | 1 |
| 41 Zn | Zn41 | 0.86812 | 0.03039 | 0.00783  | 1.000 | 0.000 | 1a | 1 |
| 42 Zn | Zn42 | 0.93952 | 1.01030 | 0.10713  | 1.000 | 0.000 | 1a | 1 |
| 43 O  | O43  | 0.86688 | 0.20639 | -0.00797 | 1.000 | 0.000 | 1a | 1 |
| 44 O  | O44  | 0.95064 | 0.19692 | 0.09230  | 1.000 | 0.000 | 1a | 1 |
| 45 Zn | Zn45 | 0.94946 | 0.26027 | 0.02538  | 1.000 | 0.000 | 1a | 1 |
| 46 Zn | Zn46 | 0.86487 | 0.26570 | 0.12003  | 1.000 | 0.000 | 1a | 1 |
| 47 O  | O47  | 0.94843 | 0.44734 | 0.04083  | 1.000 | 0.000 | 1a | 1 |
| 48 O  | O48  | 0.87028 | 0.44953 | 0.14214  | 1.000 | 0.000 | 1a | 1 |
| 49 Zn | Zn49 | 0.02698 | 0.52934 | 0.01070  | 1.000 | 0.000 | 1a | 1 |
| 50 Zn | Zn50 | 0.11543 | 0.51068 | 0.09835  | 1.000 | 0.000 | 1a | 1 |
| 51 O  | O51  | 0.02844 | 0.70420 | -0.00658 | 1.000 | 0.000 | 1a | 1 |
| 52 O  | O52  | 0.11030 | 0.70179 | 0.09150  | 1.000 | 0.000 | 1a | 1 |
| 53 Zn | Zn53 | 0.11210 | 0.76075 | 0.02374  | 1.000 | 0.000 | 1a | 1 |
| 54 Zn | Zn54 | 0.02743 | 0.76579 | 0.12119  | 1.000 | 0.000 | 1a | 1 |
| 55 O  | O55  | 0.11284 | 0.94427 | 0.04377  | 1.000 | 0.000 | 1a | 1 |
| 56 O  | O56  | 0.02085 | 0.94963 | 0.14234  | 1.000 | 0.000 | 1a | 1 |
| 57 Zn | Zn57 | 0.19619 | 0.52846 | 0.00622  | 1.000 | 0.000 | 1a | 1 |
| 58 Zn | Zn58 | 0.28041 | 0.50977 | 0.09573  | 1.000 | 0.000 | 1a | 1 |
| 59 O  | O59  | 0.19613 | 0.70674 | -0.00712 | 1.000 | 0.000 | 1a | 1 |
| 60 O  | O60  | 0.28196 | 0.70190 | 0.08997  | 1.000 | 0.000 | 1a | 1 |
| 61 Zn | Zn61 | 0.28100 | 0.76141 | 0.02250  | 1.000 | 0.000 | 1a | 1 |
| 62 Zn | Zn62 | 0.19701 | 0.76429 | 0.11803  | 1.000 | 0.000 | 1a | 1 |
| 63 O  | O63  | 0.28079 | 0.94409 | 0.04378  | 1.000 | 0.000 | 1a | 1 |
| 64 O  | O64  | 0.19579 | 0.94851 | 0.14324  | 1.000 | 0.000 | 1a | 1 |
| 65 Zn | Zn65 | 0.36649 | 0.52975 | 0.00788  | 1.000 | 0.000 | 1a | 1 |
| 66 Zn | Zn66 | 0.44229 | 0.51124 | 0.10362  | 1.000 | 0.000 | 1a | 1 |
| 67 O  | O67  | 0.36533 | 0.70642 | -0.00739 | 1.000 | 0.000 | 1a | 1 |
| 68 O  | O68  | 0.45124 | 0.69980 | 0.09139  | 1.000 | 0.000 | 1a | 1 |
| 69 Zn | Zn69 | 0.44949 | 0.76012 | 0.02399  | 1.000 | 0.000 | 1a | 1 |
| 70 Zn | Zn70 | 0.36516 | 0.76553 | 0.11942  | 1.000 | 0.000 | 1a | 1 |
| 71 O  | O71  | 0.44946 | 0.94682 | 0.04035  | 1.000 | 0.000 | 1a | 1 |
| 72 O  | O72  | 0.37166 | 0.94969 | 0.14234  | 1.000 | 0.000 | 1a | 1 |
| 73 Zn | Zn73 | 0.53258 | 0.52707 | 0.01317  | 1.000 | 0.000 | 1a | 1 |
| 74 Zn | Zn74 | 0.60974 | 0.50852 | 0.10846  | 1.000 | 0.000 | 1a | 1 |
| 75 O  | O75  | 0.52866 | 0.69612 | -0.01011 | 1.000 | 0.000 | 1a | 1 |
| 76 O  | O76  | 0.61340 | 0.68813 | 0.08496  | 1.000 | 0.000 | 1a | 1 |

|        |       |         |          |          |       |       |    |   |
|--------|-------|---------|----------|----------|-------|-------|----|---|
| 77 Zn  | Zn77  | 0.61364 | 0.75879  | 0.01734  | 1.000 | 0.000 | 1a | 1 |
| 78 Zn  | Zn78  | 0.53553 | 0.76343  | 0.12000  | 1.000 | 0.000 | 1a | 1 |
| 79 O   | O79   | 0.61267 | 0.94852  | 0.02786  | 1.000 | 0.000 | 1a | 1 |
| 80 O   | O80   | 0.54320 | 0.94826  | 0.13631  | 1.000 | 0.000 | 1a | 1 |
| 81 Zn  | Zn81  | 0.69760 | 0.52663  | 0.01718  | 1.000 | 0.000 | 1a | 1 |
| 82 Zn  | Zn82  | 0.78346 | 0.50832  | 0.10999  | 1.000 | 0.000 | 1a | 1 |
| 83 O   | O83   | 0.69743 | 0.69098  | -0.01017 | 1.000 | 0.000 | 1a | 1 |
| 84 O   | O84   | 0.78113 | 0.68728  | 0.08617  | 1.000 | 0.000 | 1a | 1 |
| 85 Zn  | Zn85  | 0.78122 | 0.75769  | 0.01779  | 1.000 | 0.000 | 1a | 1 |
| 86 Zn  | Zn86  | 0.69699 | 0.76299  | 0.11182  | 1.000 | 0.000 | 1a | 1 |
| 87 O   | O87   | 0.78162 | 0.94805  | 0.02661  | 1.000 | 0.000 | 1a | 1 |
| 88 O   | O88   | 0.69804 | 0.94351  | 0.12144  | 1.000 | 0.000 | 1a | 1 |
| 89 Zn  | Zn89  | 0.86324 | 0.52598  | 0.01701  | 1.000 | 0.000 | 1a | 1 |
| 90 Zn  | Zn90  | 0.95371 | 0.51044  | 0.10868  | 1.000 | 0.000 | 1a | 1 |
| 91 O   | O91   | 0.86616 | 0.69222  | -0.00865 | 1.000 | 0.000 | 1a | 1 |
| 92 O   | O92   | 0.94281 | 0.69612  | 0.09213  | 1.000 | 0.000 | 1a | 1 |
| 93 Zn  | Zn93  | 0.94481 | 0.75979  | 0.02512  | 1.000 | 0.000 | 1a | 1 |
| 94 Zn  | Zn94  | 0.85886 | 0.76430  | 0.12117  | 1.000 | 0.000 | 1a | 1 |
| 95 O   | O95   | 0.94526 | 0.94773  | 0.03926  | 1.000 | 0.000 | 1a | 1 |
| 96 O   | O96   | 0.85228 | 0.94886  | 0.13397  | 1.000 | 0.000 | 1a | 1 |
| 97 Ti  | Ti97  | 0.19206 | 0.63011  | 0.23349  | 1.000 | 0.000 | 1a | 1 |
| 98 Ti  | Ti98  | 0.09439 | 0.13619  | 0.23320  | 1.000 | 0.000 | 1a | 1 |
| 99 Ti  | Ti99  | 0.08871 | 0.40399  | 0.21690  | 1.000 | 0.000 | 1a | 1 |
| 100 Ti | Ti100 | 0.19305 | -0.09925 | 0.21547  | 1.000 | 0.000 | 1a | 1 |
| 101 O  | O101  | 0.19184 | 0.43790  | 0.21824  | 1.000 | 0.000 | 1a | 1 |
| 102 O  | O102  | 0.09571 | -0.05730 | 0.21815  | 1.000 | 0.000 | 1a | 1 |
| 103 O  | O103  | 0.09293 | 0.23426  | 0.18257  | 1.000 | 0.000 | 1a | 1 |
| 104 O  | O104  | 0.19448 | 0.72448  | 0.18348  | 1.000 | 0.000 | 1a | 1 |
| 105 O  | O105  | 0.19312 | 0.08929  | 0.23971  | 1.000 | 0.000 | 1a | 1 |
| 106 O  | O106  | 0.09060 | 0.58522  | 0.23768  | 1.000 | 0.000 | 1a | 1 |
| 107 O  | O107  | 0.09046 | 0.29247  | 0.26441  | 1.000 | 0.000 | 1a | 1 |
| 108 O  | O108  | 0.19196 | -0.21381 | 0.26386  | 1.000 | 0.000 | 1a | 1 |
| 109 Ti | Ti109 | 0.39303 | 0.63219  | 0.23370  | 1.000 | 0.000 | 1a | 1 |
| 110 Ti | Ti110 | 0.29253 | 0.13421  | 0.23386  | 1.000 | 0.000 | 1a | 1 |
| 111 Ti | Ti111 | 0.29366 | 0.40159  | 0.22240  | 1.000 | 0.000 | 1a | 1 |
| 112 Ti | Ti112 | 0.38997 | -0.09809 | 0.21581  | 1.000 | 0.000 | 1a | 1 |
| 113 O  | O113  | 0.39490 | 0.43992  | 0.22010  | 1.000 | 0.000 | 1a | 1 |
| 114 O  | O114  | 0.29108 | -0.05625 | 0.21854  | 1.000 | 0.000 | 1a | 1 |
| 115 O  | O115  | 0.29623 | 0.24017  | 0.18489  | 1.000 | 0.000 | 1a | 1 |
| 116 O  | O116  | 0.38825 | 0.72721  | 0.18367  | 1.000 | 0.000 | 1a | 1 |
| 117 O  | O117  | 0.39072 | 0.08694  | 0.24114  | 1.000 | 0.000 | 1a | 1 |
| 118 O  | O118  | 0.29275 | 0.58342  | 0.24173  | 1.000 | 0.000 | 1a | 1 |
| 119 O  | O119  | 0.29184 | 0.28742  | 0.26816  | 1.000 | 0.000 | 1a | 1 |
| 120 O  | O120  | 0.39321 | -0.21180 | 0.26428  | 1.000 | 0.000 | 1a | 1 |
| 121 Ti | Ti121 | 0.59463 | 0.63960  | 0.22975  | 1.000 | 0.000 | 1a | 1 |
| 122 Ti | Ti122 | 0.48956 | 0.13735  | 0.23177  | 1.000 | 0.000 | 1a | 1 |
| 123 Ti | Ti123 | 0.49593 | 0.40646  | 0.21270  | 1.000 | 0.000 | 1a | 1 |
| 124 Ti | Ti124 | 0.58820 | -0.09219 | 0.20978  | 1.000 | 0.000 | 1a | 1 |
| 125 O  | O125  | 0.59520 | 0.44359  | 0.21593  | 1.000 | 0.000 | 1a | 1 |
| 126 O  | O126  | 0.48735 | -0.05768 | 0.21604  | 1.000 | 0.000 | 1a | 1 |
| 127 O  | O127  | 0.48248 | 0.23155  | 0.18111  | 1.000 | 0.000 | 1a | 1 |
| 128 O  | O128  | 0.59626 | 0.73162  | 0.17772  | 1.000 | 0.000 | 1a | 1 |
| 129 O  | O129  | 0.59033 | 0.08625  | 0.23255  | 1.000 | 0.000 | 1a | 1 |
| 130 O  | O130  | 0.49478 | 0.59108  | 0.23273  | 1.000 | 0.000 | 1a | 1 |
| 131 O  | O131  | 0.49942 | 0.29207  | 0.26148  | 1.000 | 0.000 | 1a | 1 |
| 132 O  | O132  | 0.58916 | -0.20152 | 0.25855  | 1.000 | 0.000 | 1a | 1 |
| 133 Ti | Ti133 | 0.79138 | 0.63739  | 0.23091  | 1.000 | 0.000 | 1a | 1 |
| 134 Ti | Ti134 | 0.69247 | 0.12976  | 0.22943  | 1.000 | 0.000 | 1a | 1 |
| 135 Ti | Ti135 | 0.69253 | 0.40135  | 0.21347  | 1.000 | 0.000 | 1a | 1 |
| 136 Ti | Ti136 | 0.79513 | -0.09511 | 0.21368  | 1.000 | 0.000 | 1a | 1 |
| 137 O  | O137  | 0.79050 | 0.44344  | 0.21712  | 1.000 | 0.000 | 1a | 1 |
| 138 O  | O138  | 0.69242 | -0.05918 | 0.21239  | 1.000 | 0.000 | 1a | 1 |

|        |       |         |          |         |       |       |    |   |
|--------|-------|---------|----------|---------|-------|-------|----|---|
| 139 O  | O139  | 0.69361 | 0.22746  | 0.18027 | 1.000 | 0.000 | 1a | 1 |
| 140 O  | O140  | 0.79506 | 0.73400  | 0.17980 | 1.000 | 0.000 | 1a | 1 |
| 141 O  | O141  | 0.79392 | 0.08480  | 0.23514 | 1.000 | 0.000 | 1a | 1 |
| 142 O  | O142  | 0.69290 | 0.59087  | 0.23694 | 1.000 | 0.000 | 1a | 1 |
| 143 O  | O143  | 0.69180 | 0.28442  | 0.26100 | 1.000 | 0.000 | 1a | 1 |
| 144 O  | O144  | 0.79172 | -0.20461 | 0.26147 | 1.000 | 0.000 | 1a | 1 |
| 145 Ti | Ti145 | 0.98987 | 0.63492  | 0.23388 | 1.000 | 0.000 | 1a | 1 |
| 146 Ti | Ti146 | 0.89502 | 0.13350  | 0.23312 | 1.000 | 0.000 | 1a | 1 |
| 147 Ti | Ti147 | 0.88920 | 0.40323  | 0.21598 | 1.000 | 0.000 | 1a | 1 |
| 148 Ti | Ti148 | 0.99604 | -0.09615 | 0.21610 | 1.000 | 0.000 | 1a | 1 |
| 149 O  | O149  | 0.98813 | 0.44051  | 0.22027 | 1.000 | 0.000 | 1a | 1 |
| 150 O  | O150  | 0.89699 | -0.05972 | 0.21858 | 1.000 | 0.000 | 1a | 1 |
| 151 O  | O151  | 0.89964 | 0.22950  | 0.18316 | 1.000 | 0.000 | 1a | 1 |
| 152 O  | O152  | 0.98764 | 0.72933  | 0.18343 | 1.000 | 0.000 | 1a | 1 |
| 153 O  | O153  | 0.99555 | 0.08658  | 0.24004 | 1.000 | 0.000 | 1a | 1 |
| 154 O  | O154  | 0.88952 | 0.58775  | 0.23969 | 1.000 | 0.000 | 1a | 1 |
| 155 O  | O155  | 0.88707 | 0.28757  | 0.26397 | 1.000 | 0.000 | 1a | 1 |
| 156 O  | O156  | 0.99672 | -0.21044 | 0.26441 | 1.000 | 0.000 | 1a | 1 |
| 157 S  | S157  | 0.50907 | 0.57940  | 0.34059 | 1.000 | 0.000 | 1a | 1 |
| 158 O  | O158  | 0.44067 | 0.53652  | 0.32684 | 1.000 | 0.000 | 1a | 1 |
| 159 O  | O159  | 0.57422 | 0.55377  | 0.31763 | 1.000 | 0.000 | 1a | 1 |
| 160 F  | F160  | 0.51976 | 0.53710  | 0.39193 | 1.000 | 0.000 | 1a | 1 |
| 161 F  | F161  | 0.50516 | 0.73128  | 0.35064 | 1.000 | 0.000 | 1a | 1 |
